# Supplementary material
Source: MDPI journal article supplement (https://www.mdpi.com/2073-4344/13/4/658)
Supplement: s1 [file s1]

## Supporting Information

# One-Pot Synthesis of Benzoxazole/Benzothiazole-Substituted Esters by Michael Addition: A Selective Construction of C-N/C-S Bonds

Zhi-Ying Gong <sup>1,†</sup>, Cheng-Li Yang <sup>1,†</sup>, Dan Wang <sup>1</sup>, Lang Huang <sup>1</sup> and Zhi-Bing Dong <sup>1,2,3,\*</sup>

<sup>1</sup> School of Chemistry and Environmental Engineering, Wuhan Institute of Technology, Wuhan 430205, China;

m18235462356@163.com (Z.-Y.G.); ycl\_carol@163.com (C.-L.Y.); zisedehua13@163.com (D.W.);

17362493690@163.com (L.H.)

<sup>2</sup> Key Laboratory of Green Chemical Process, Ministry of Education, Wuhan Institute of Technology,  
Wuhan 430205, China

<sup>3</sup> School of Chemistry and Chemical Engineering, Henan Normal University, Xinxiang 453007, China

\* Correspondence: dzb04982@wit.edu.cn

† These authors contributed equally to this work.

## Table of Contents

|                                                                                         |        |
|-----------------------------------------------------------------------------------------|--------|
| I. X-ray diffraction analysis of compound <b>3ai</b> and <b>5ag'</b> .....              | S1-S4  |
| II. $^1\text{H}$ NMR and $^{13}\text{C}\{^1\text{H}\}$ NMR spectra of all products..... | S5-S33 |

## I. X-ray diffraction analysis of compound **3ai**

The method for crystal growth is slow volatilization using EA (Ethyl acetate) as a solvent.

The crystallographic data for the single crystal of the complex **3d** was collected on a CrysAlis PRO 1.171.39.7a (Rigaku OD, 2015) employing graphite-monochromated MoK $\alpha$  radiation ( $\lambda = 0.71073$  Å). Empirical absorption corrections were applied using the CrysAlisPro program at 300 K and 293 K respectively. The structure was solved by direct method and refined by least-squares. Program used to solve structure is SHELXS (Sheldrick, 2008); program used to refine structure is SHELXH (Sheldrick, 2015). Hydrogen atoms of -CH, -CH<sub>2</sub>, -CH<sub>3</sub> groups were placed in geometrically calculated positions and were included in the refinement process using riding model with isotropic thermal parameters. Crystallography data and structure refinement for **3ai** (CCDC 2152821). Thermal ellipsoids are shown at 30% probability level.

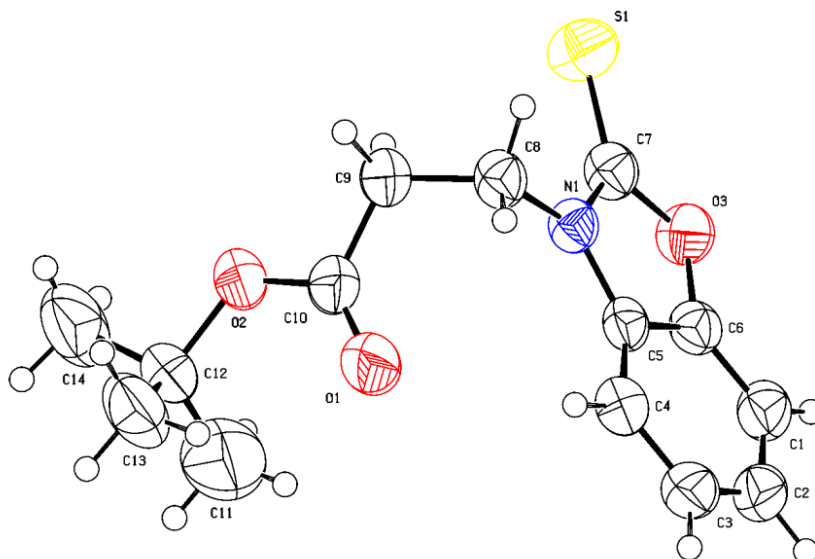

Bond precision: C-C = 0.0043 Å

Wavelength=0.71076

Cell: a=9.2629 (8)  
alpha=90

b=6.4277 (5)  
beta=93.049 (2)

c=25.022 (2)  
gamma=90

Temperature: 296 K

|                        | Calculated     |
|------------------------|----------------|
| Volume                 | 1487.7 (2)     |
| Space group            | P 21/c         |
| Hall group             | -P 2ybc        |
| Moiety formula         | C14 H17 N O3 S |
| Sum formula            | C14 H17 N O3 S |
| Mr                     | 279.35         |
| Dx, g cm <sup>-3</sup> | 1.247          |
| Z                      | 4              |
| Mu (mm <sup>-1</sup> ) | 0.221          |
| F000                   | 592.0          |
| F000'                  | 592.76         |
| h, k, lmax             | 11, 7, 29      |
| Nref                   | 2653           |
| Tmin, Tmax             |                |
| Tmin'                  |                |

| Reported       |
|----------------|
| 1487.7 (2)     |
| P 1 21/c 1     |
| -P 2ybc        |
| C14 H17 N O3 S |
| C14 H17 N O3 S |
| 279.34         |
| 1.247          |
| 4              |
| 0.221          |
| 592.0          |
| 592.76         |
| 11, 7, 29      |
| 2636           |

Correction method= Not given

Data completeness= 0.994

Theta(max)= 25.113

R(reflections)= 0.0516 ( 1573)

wR2(reflections)=  
0.1124 ( 2636)

S = 1.066

Npar= 176

### **X-ray diffraction analysis of compound **5ag'****

The method for crystal growth is slow volatilization using EA (Ethyl acetate) as a solvent.

The crystallographic data for the single crystal of the complex **5ag'** was collected on a CrysAlis PRO 1.171.39.7a (Rigaku OD, 2015) employing graphite-monochromated MoK $\alpha$  radiation ( $\lambda = 0.71073$  Å). Empirical absorption corrections were applied using the CrysAlisPro program at 300 K and 293 K respectively. The structure was solved by direct method and refined by least-squares. Program used to solve structure is SHELXS (Sheldrick, 2008); program used to refine structure is SHELXH (Sheldrick, 2015). Hydrogen atoms of -CH, -CH<sub>2</sub>, -CH<sub>3</sub> groups were placed in geometrically calculated positions and were included in the refinement process using riding model with isotropic thermal parameters. Crystallography data and structure refinement for **5ag'** (CCDC 2152790). Thermal ellipsoids are shown at 30% probability level.

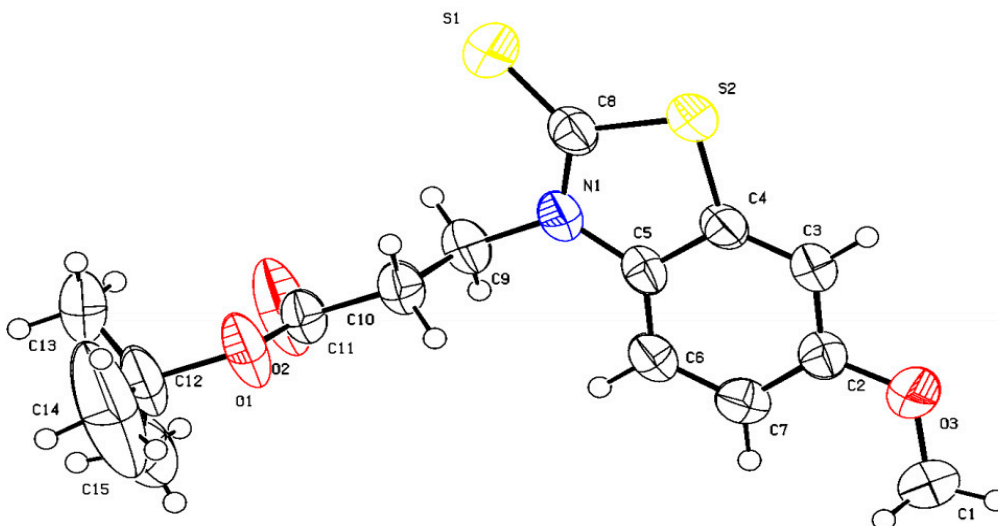

Bond precision: C-C = 0.0088 Å

Wavelength=0.71076

Cell: a=5.613(2)

b=9.721(4)

c=15.530(6)

alpha=99.074(9)

beta=93.439(9)

gamma=99.797(9)

Temperature: 296 K

|                        | Calculated      | Reported        |
|------------------------|-----------------|-----------------|
| Volume                 | 821.3(5)        | 821.3(5)        |
| Space group            | P -1            | P -1            |
| Hall group             | -P 1            | -P 1            |
| Moiety formula         | C15 H19 N O3 S2 | C15 H19 N O3 S2 |
| Sum formula            | C15 H19 N O3 S2 | C15 H19 N O3 S2 |
| Mr                     | 325.43          | 325.43          |
| Dx, g cm <sup>-3</sup> | 1.316           | 1.316           |
| Z                      | 2               | 2               |
| Mu (mm <sup>-1</sup> ) | 0.333           | 0.332           |
| F000                   | 344.0           | 344.0           |
| F000'                  | 344.63          |                 |
| h,k,lmax               | 6,11,18         | 6,11,18         |
| Nref                   | 2979            | 2951            |
| Tmin,Tmax              |                 | 0.662, 0.745    |
| Tmin'                  |                 |                 |

Correction method= # Reported T Limits: Tmin=0.662 Tmax=0.745

AbsCorr = MULTI-SCAN

Data completeness= 0.991

Theta (max)= 25.220

R(reflections)= 0.0815( 1707)

wR2(reflections)=  
0.2623( 2951)

S = 1.053

Npar= 194

## II. $^1\text{H}$ -NMR and $^{13}\text{C}\{^1\text{H}\}$ -NMR spectra of all products

### ethyl 3-(2-thioxobenzo[d]oxazol-3(2H)-yl)propanoate (3aa)

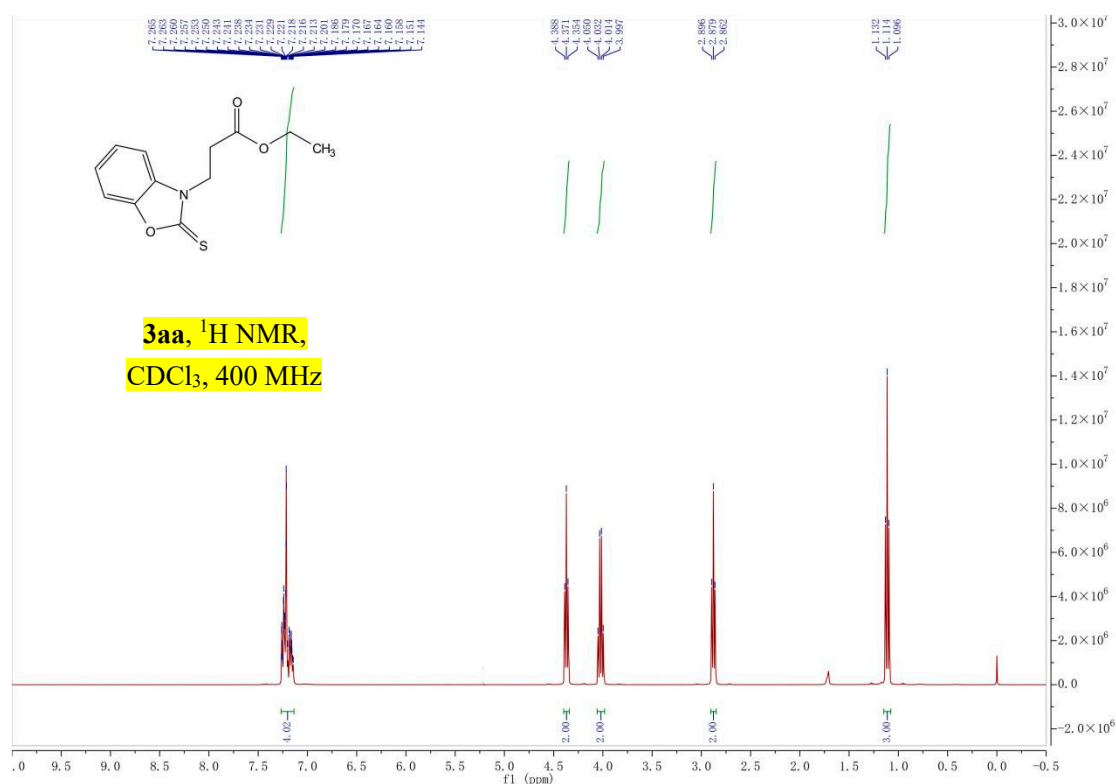

$^1\text{H}$  NMR

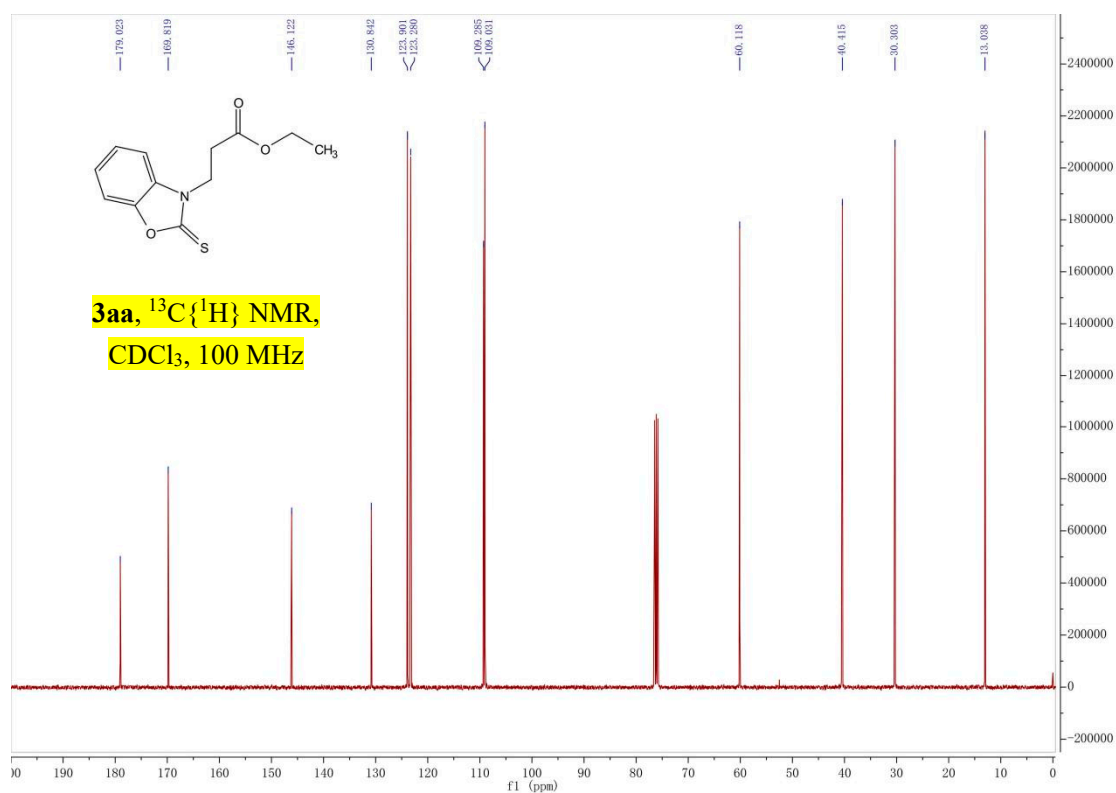

$^{13}\text{C}\{^1\text{H}\}$  NMR

ethyl 3-(5-bromo-2-thioxobenzo[d]oxazol-3(2H)-yl)propanoate (3ab)

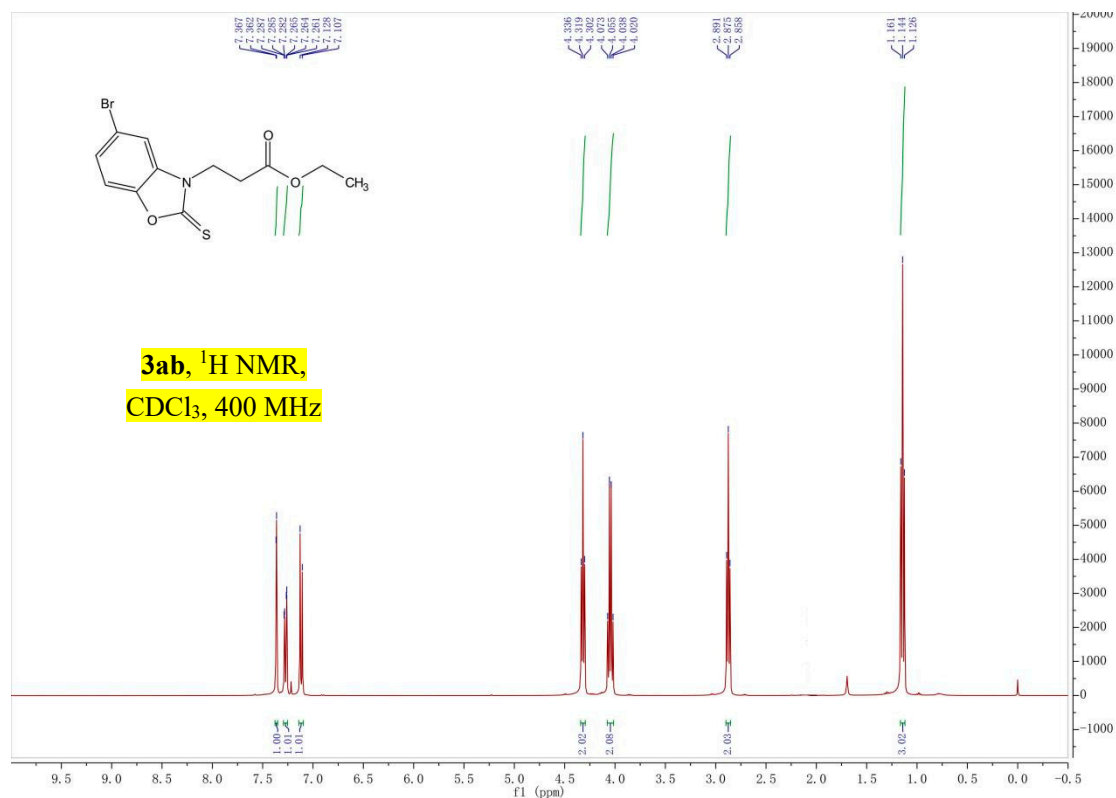

$^1\text{H}$  NMR

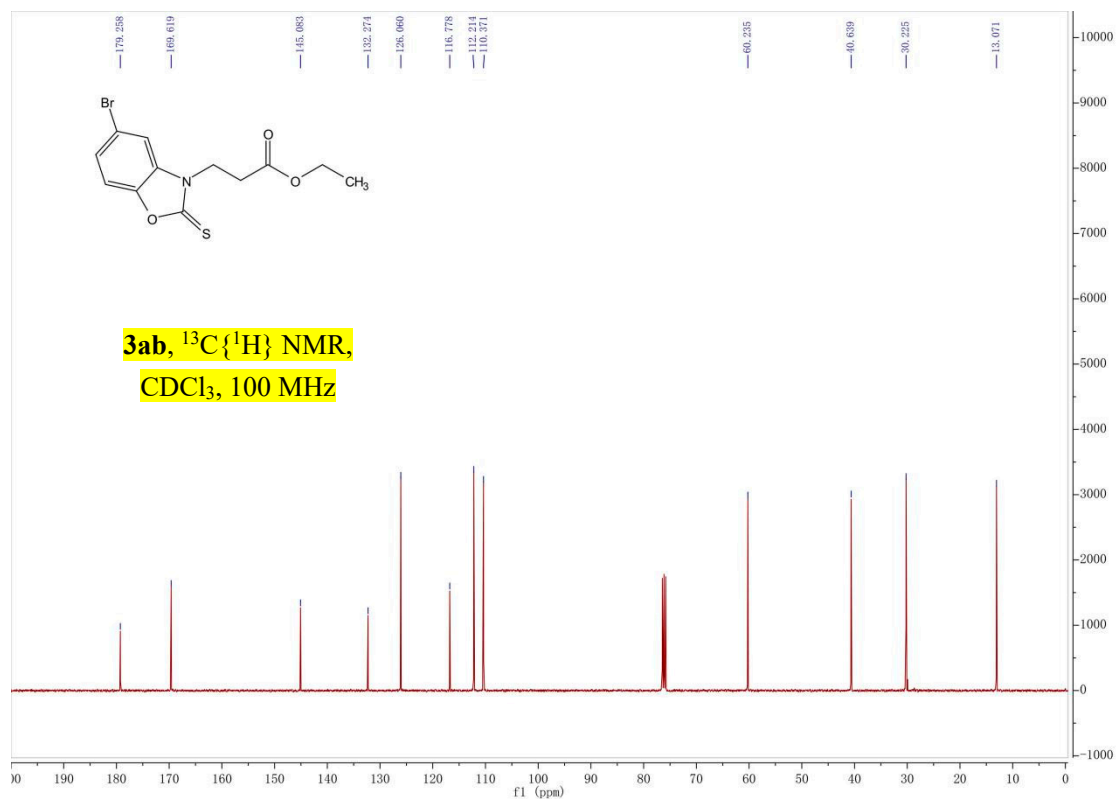

$^{13}\text{C}\{^1\text{H}\}$  NMR



ethyl 3-(6-methyl-2-thioxobenzo[d]oxazol-3(2H)-yl)propanoate (**3ac**)

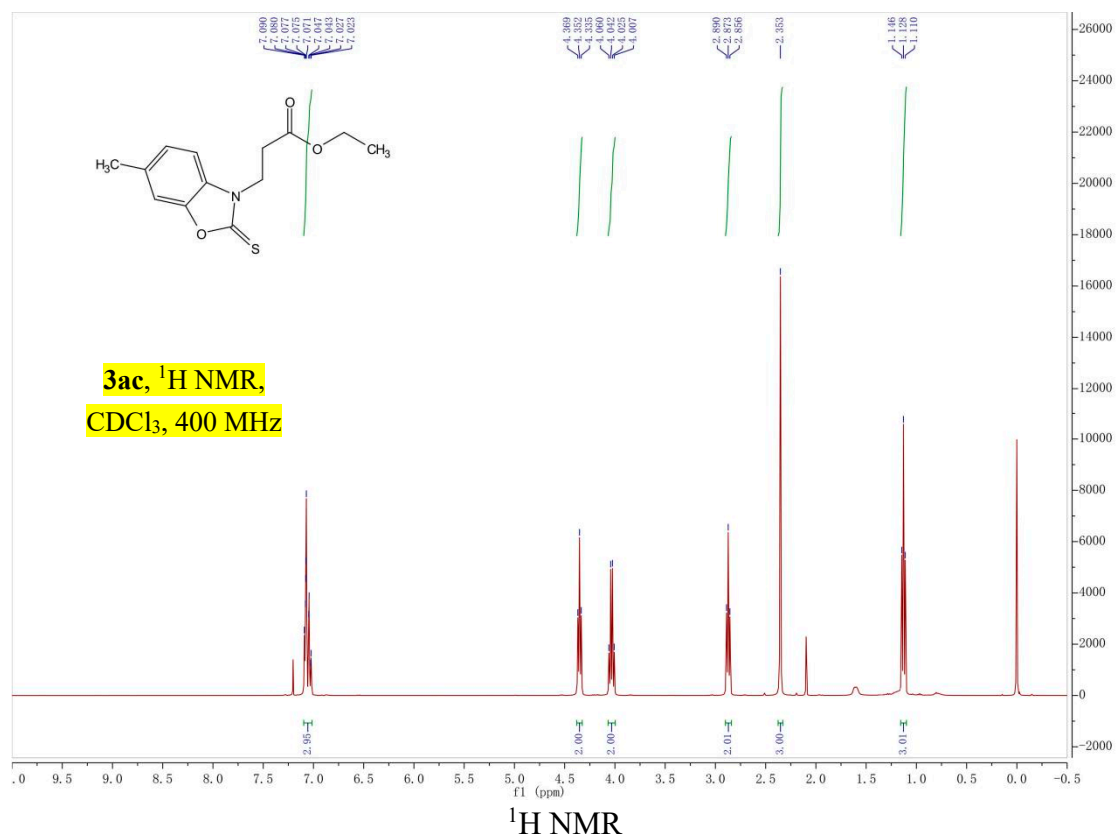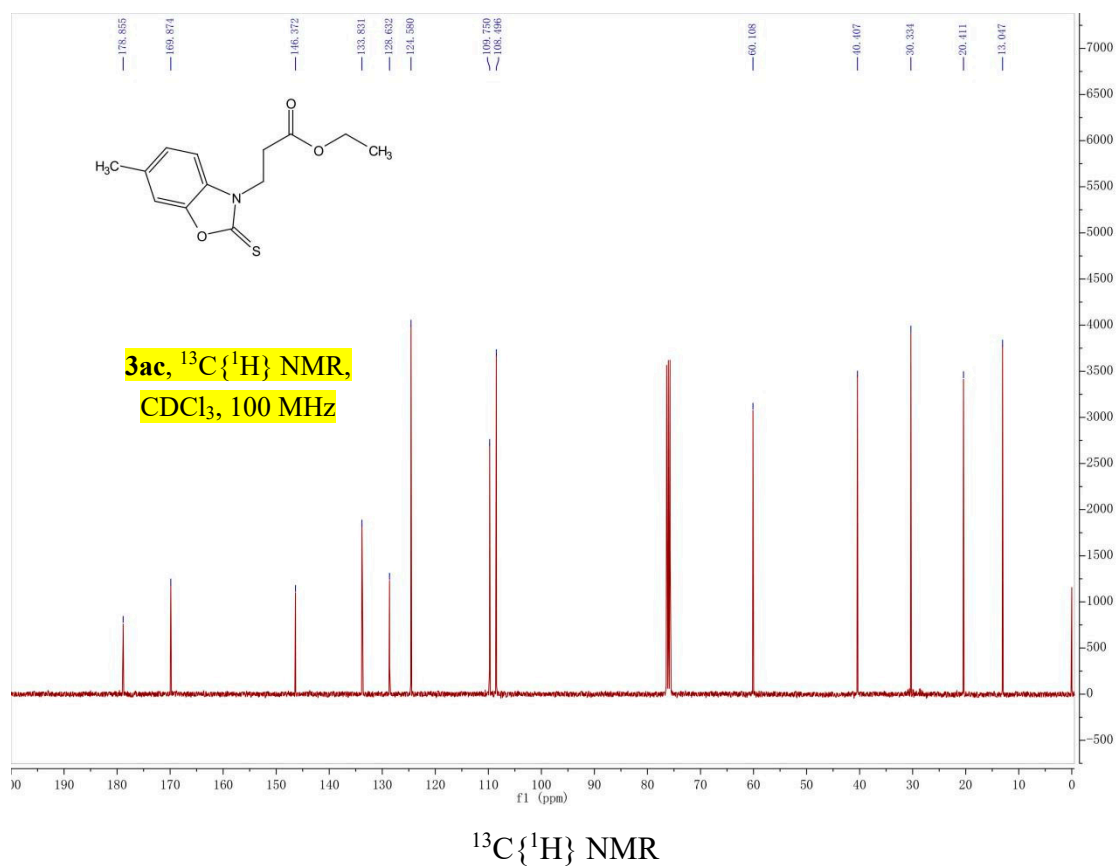

ethyl 3-(5-chloro-2-thioxobenzo[d]oxazol-3(2H)-yl)propanoate (3ad)

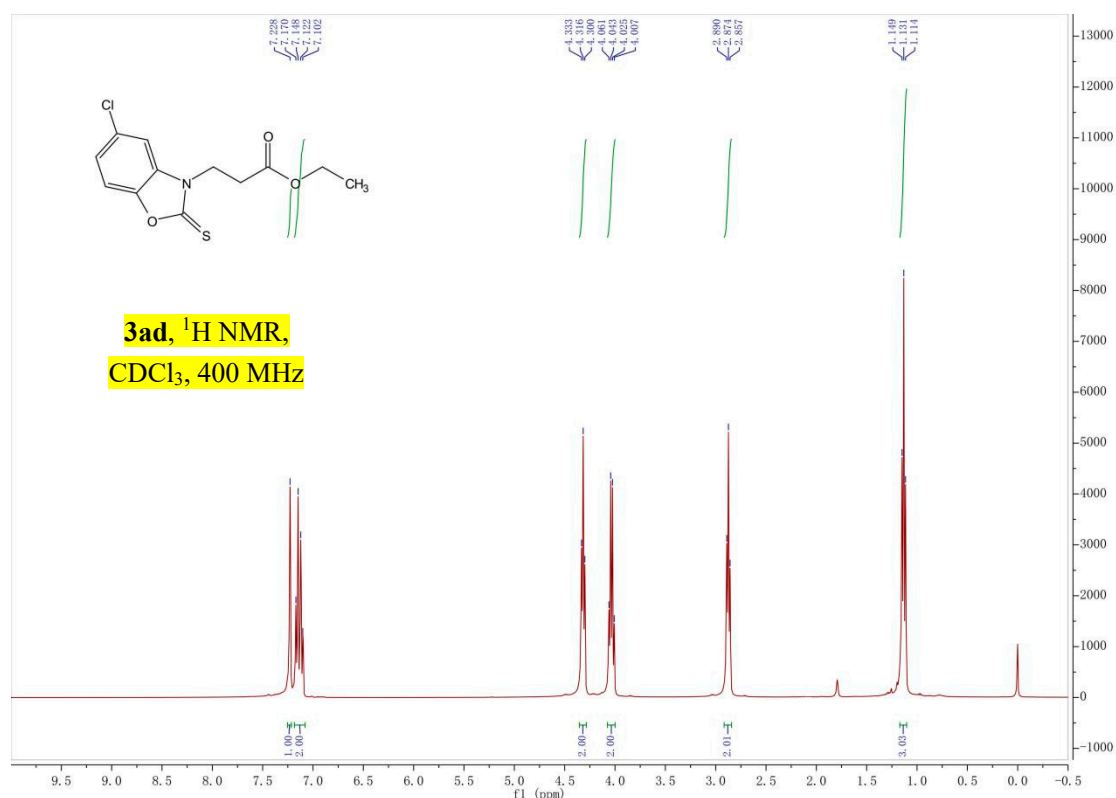

$^1\text{H}$  NMR

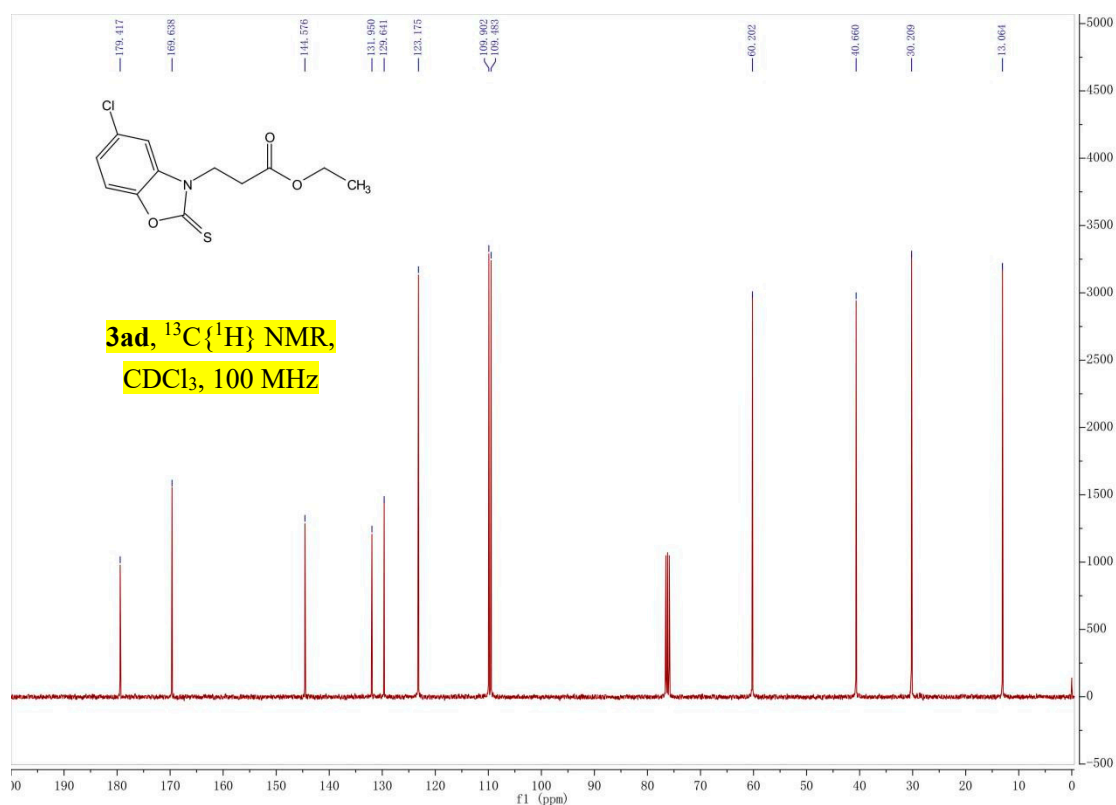

$^{13}\text{C}\{^1\text{H}\}$  NMR

ethyl 3-(5-(*tert*-butyl)-2-mercaptobenzo[d]oxazol-3(2*H*)-yl)propanoate (**3ae**)

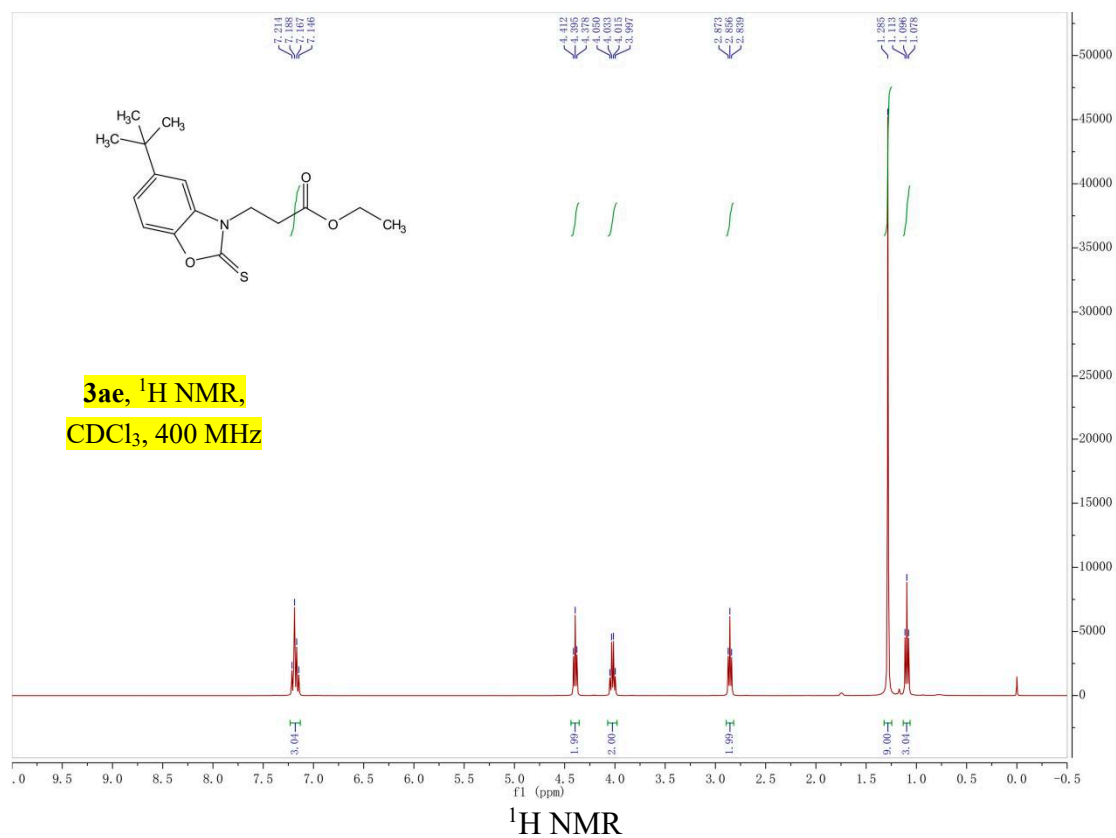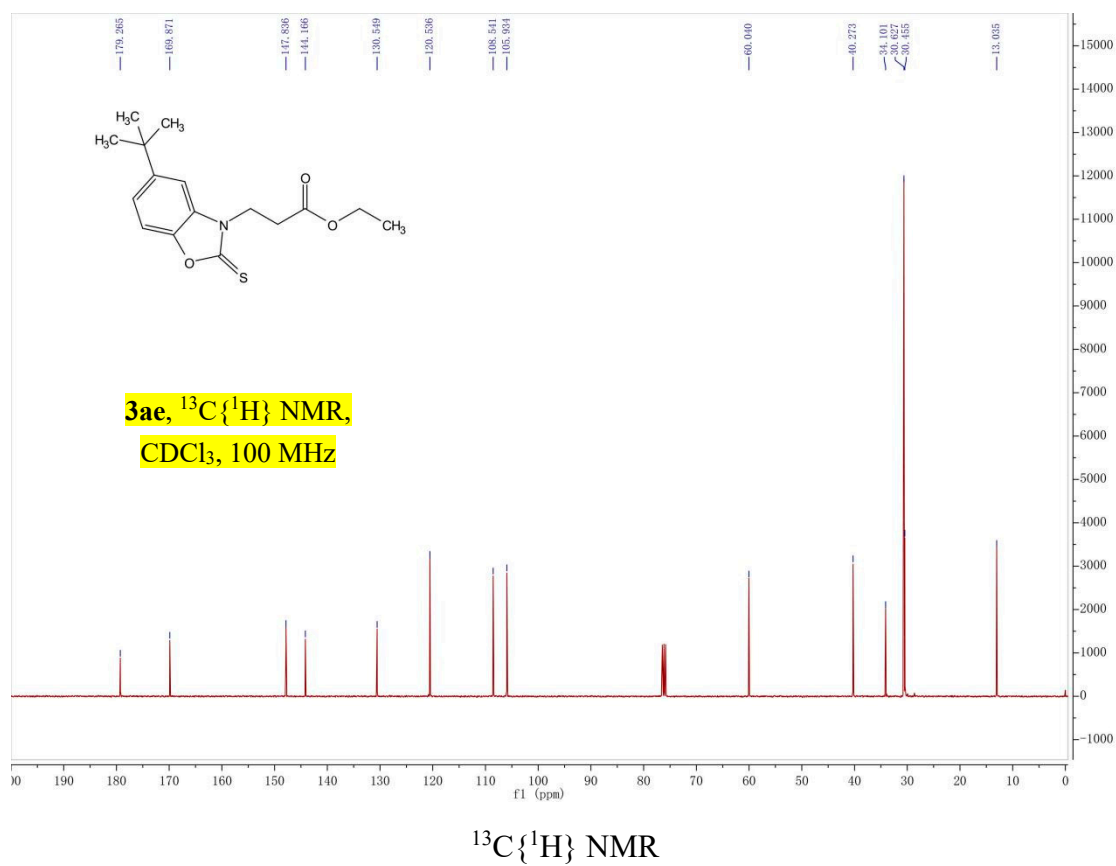

ethyl 3-(6-chloro-2-thioxobenzo[d]oxazol-3(2H)-yl)propanoate (3af)

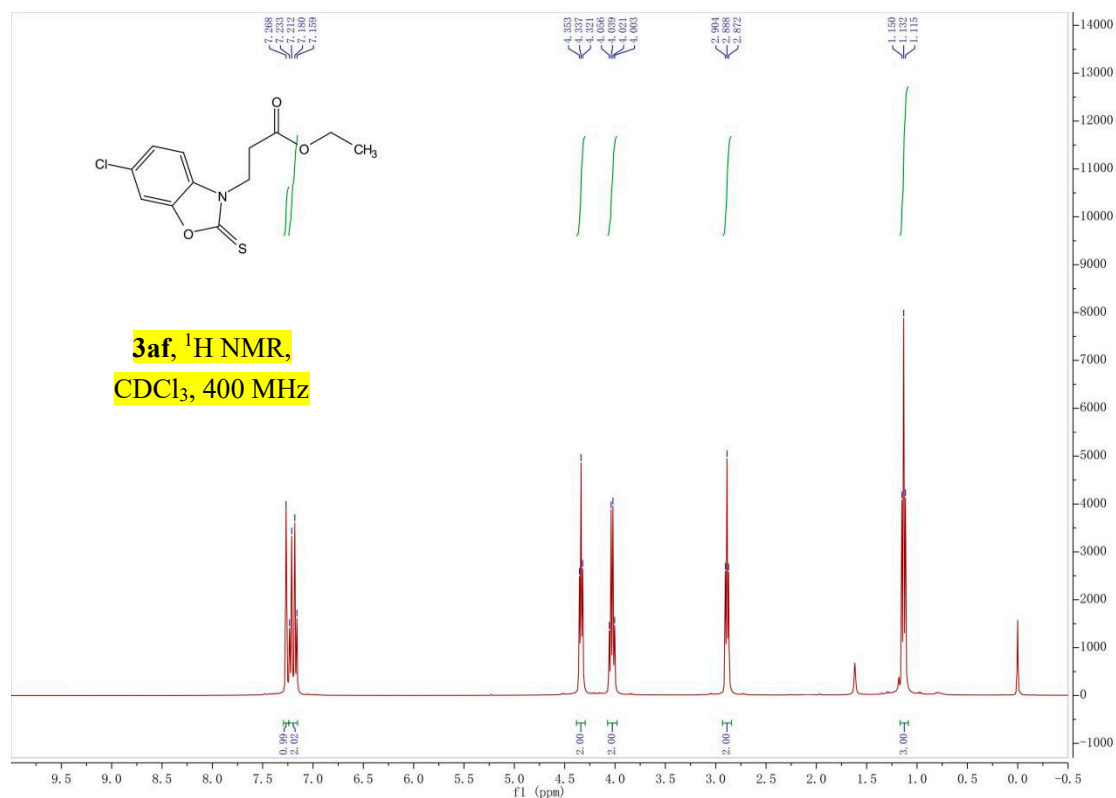

$^1\text{H}$  NMR

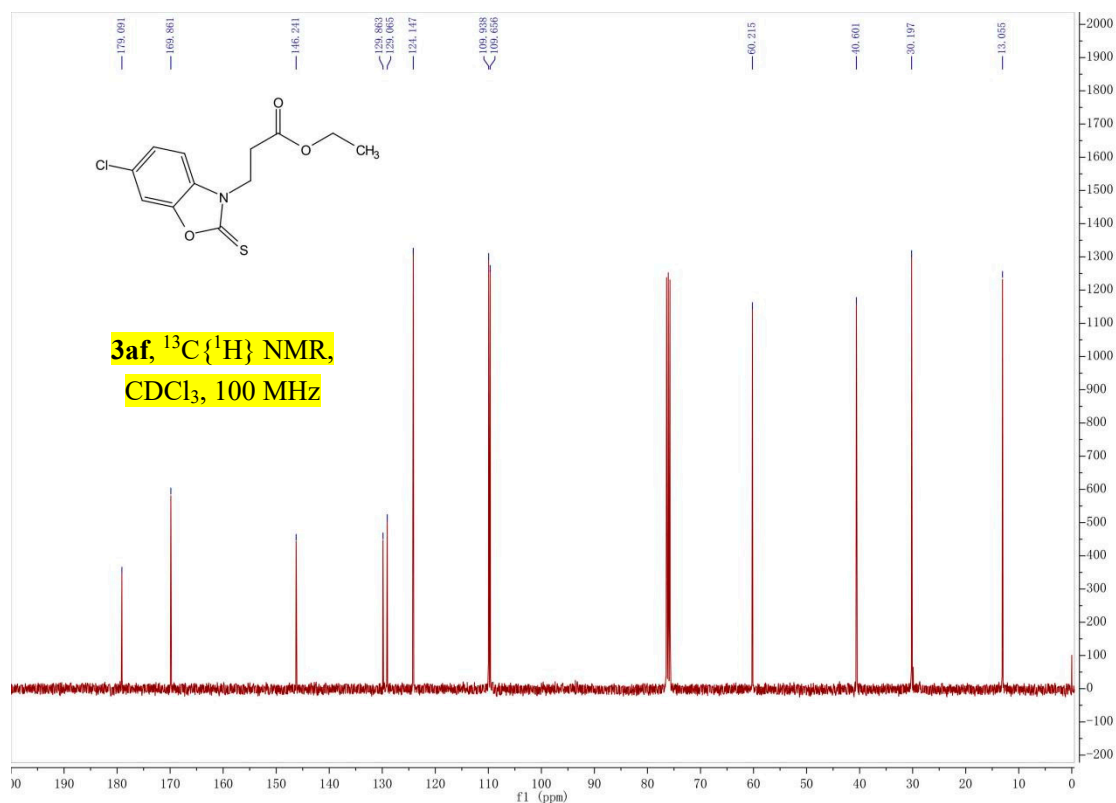

$^{13}\text{C}\{^1\text{H}\}$  NMR

ethyl 3-(5-methyl-2-thioxobenzo[d]oxazol-3(2H)-yl)propanoate (**3ag**)

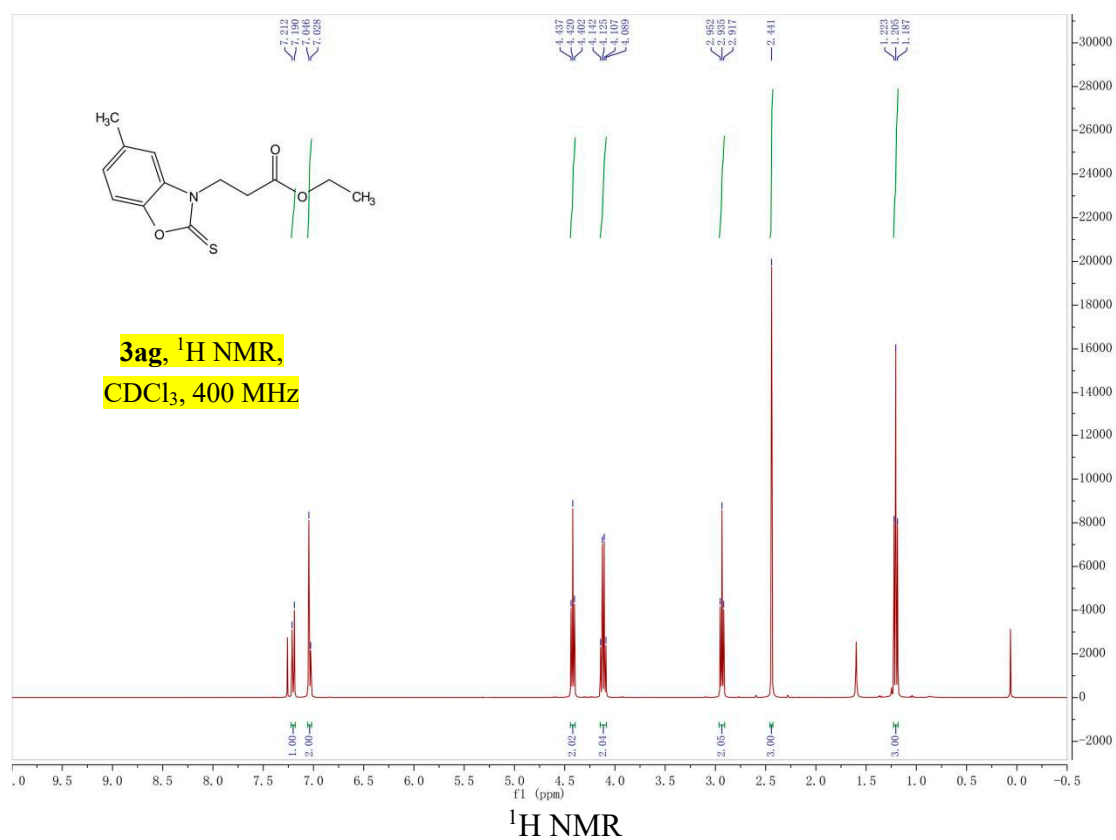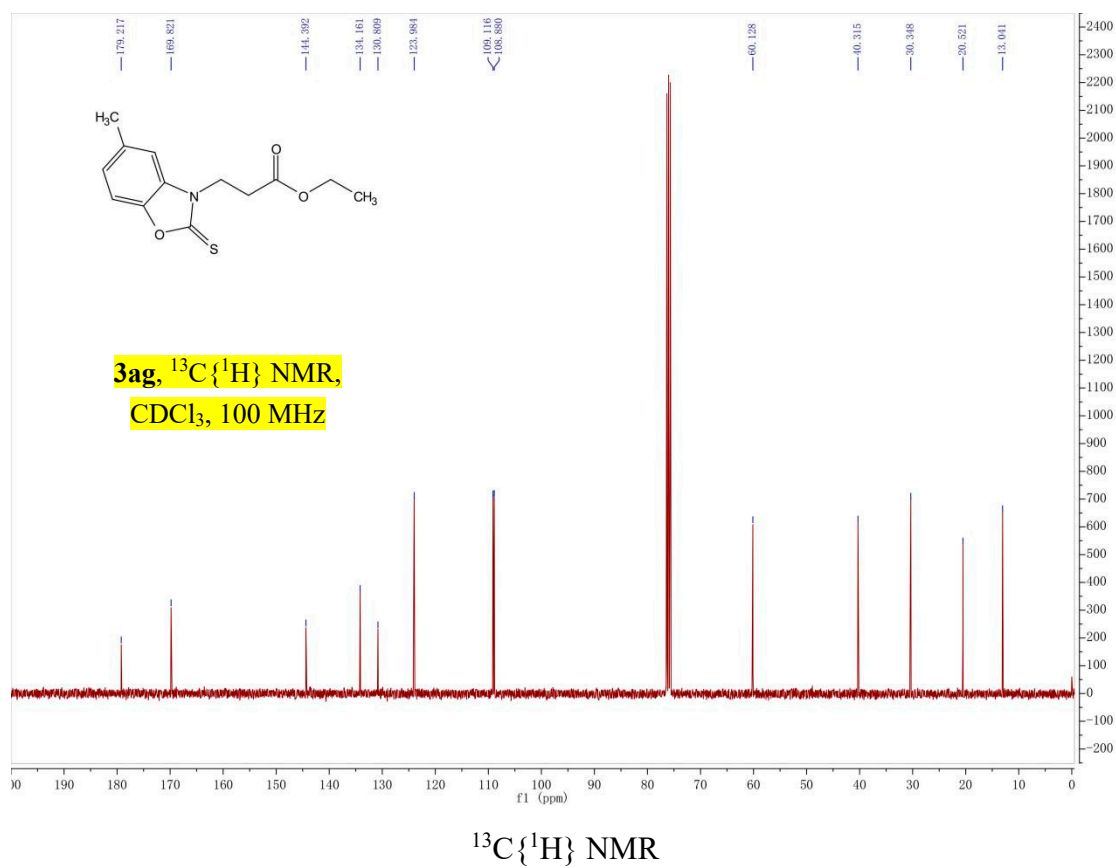

ethyl 3-(4-methyl-2-thioxobenzo[d]oxazol-3(2H)-yl)propanoate (**3ah**)

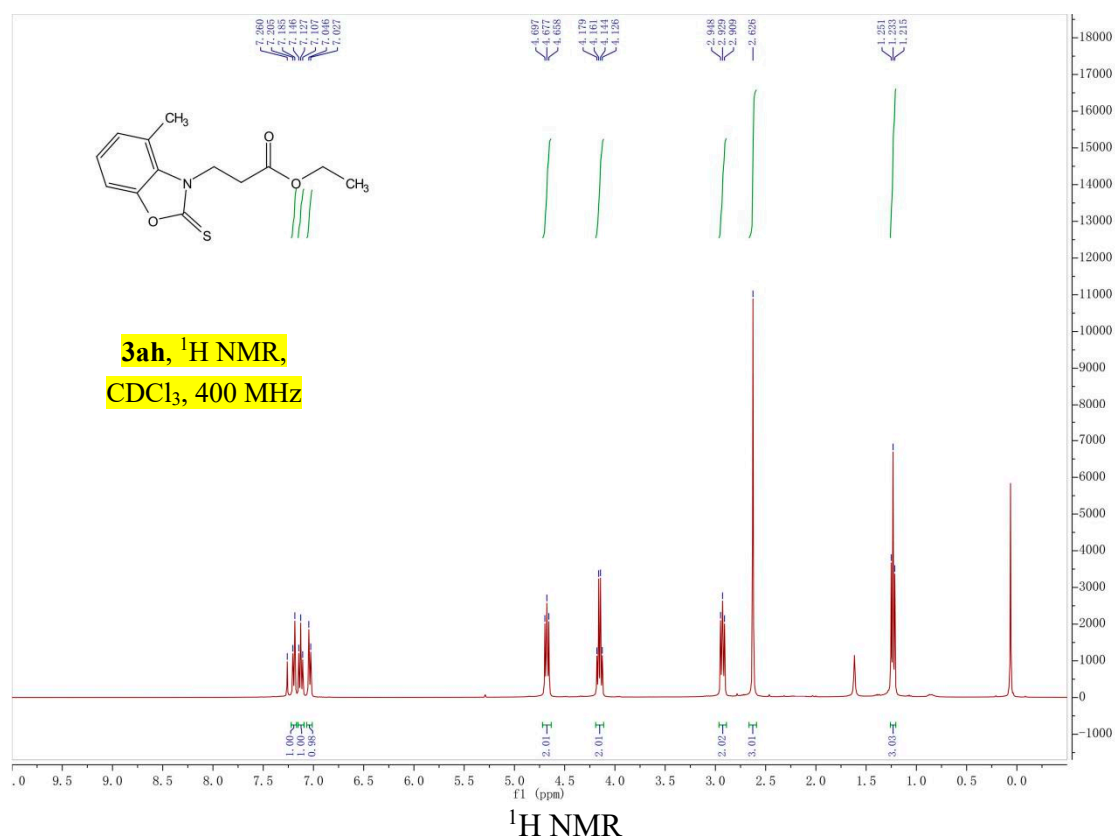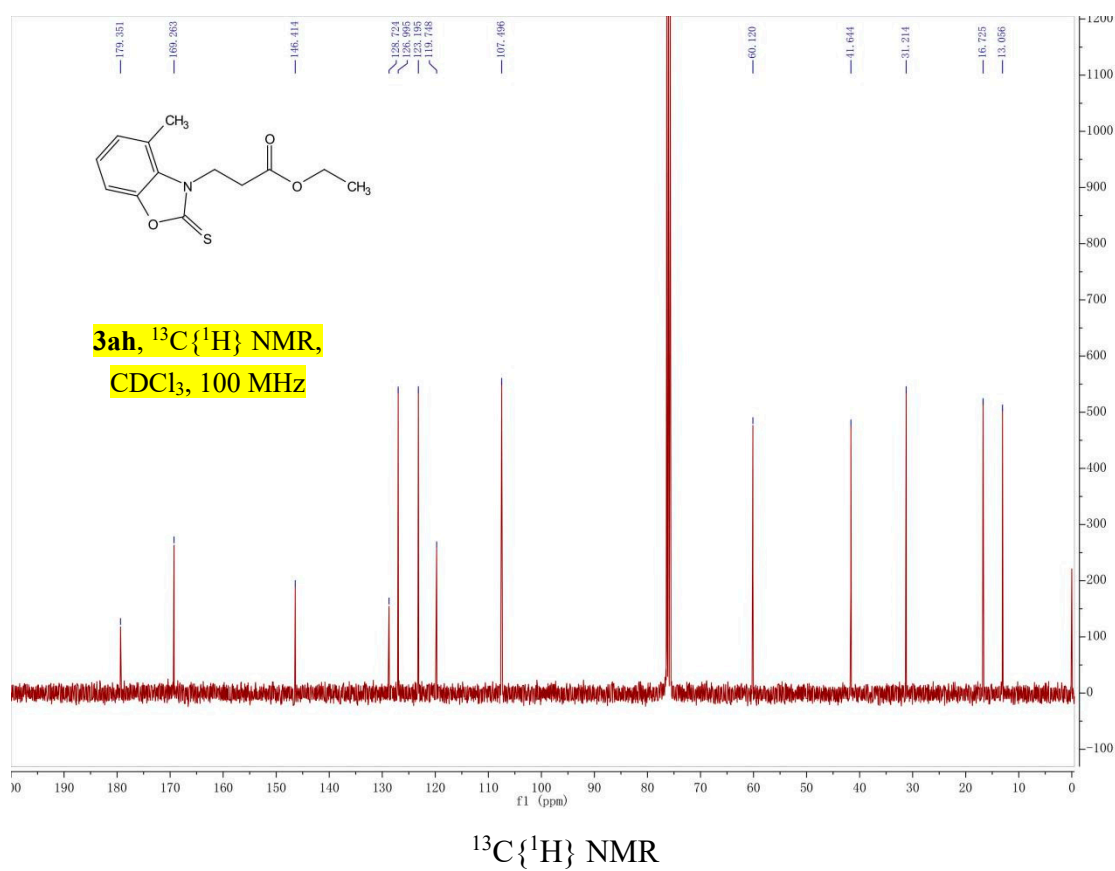

***tert*-butyl 3-(2-thioxobenzo[d]oxazol-3(2*H*)-yl)propanoate (3ai)**

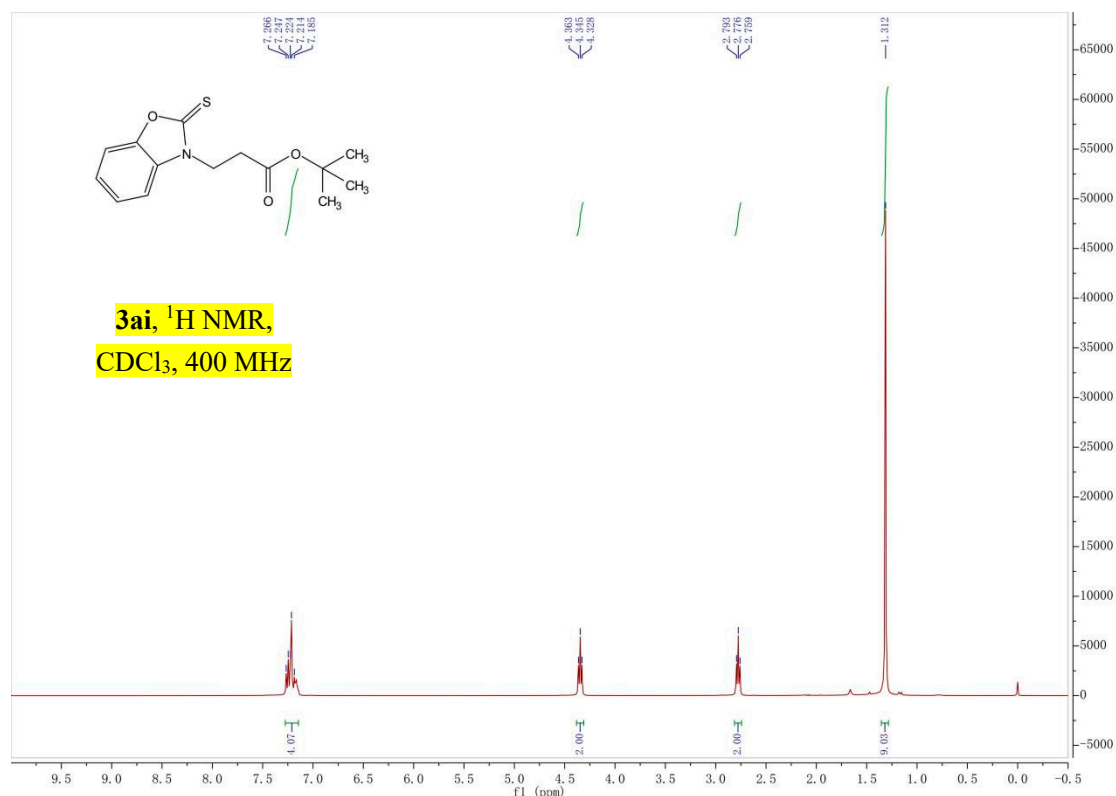

$^1\text{H}$  NMR

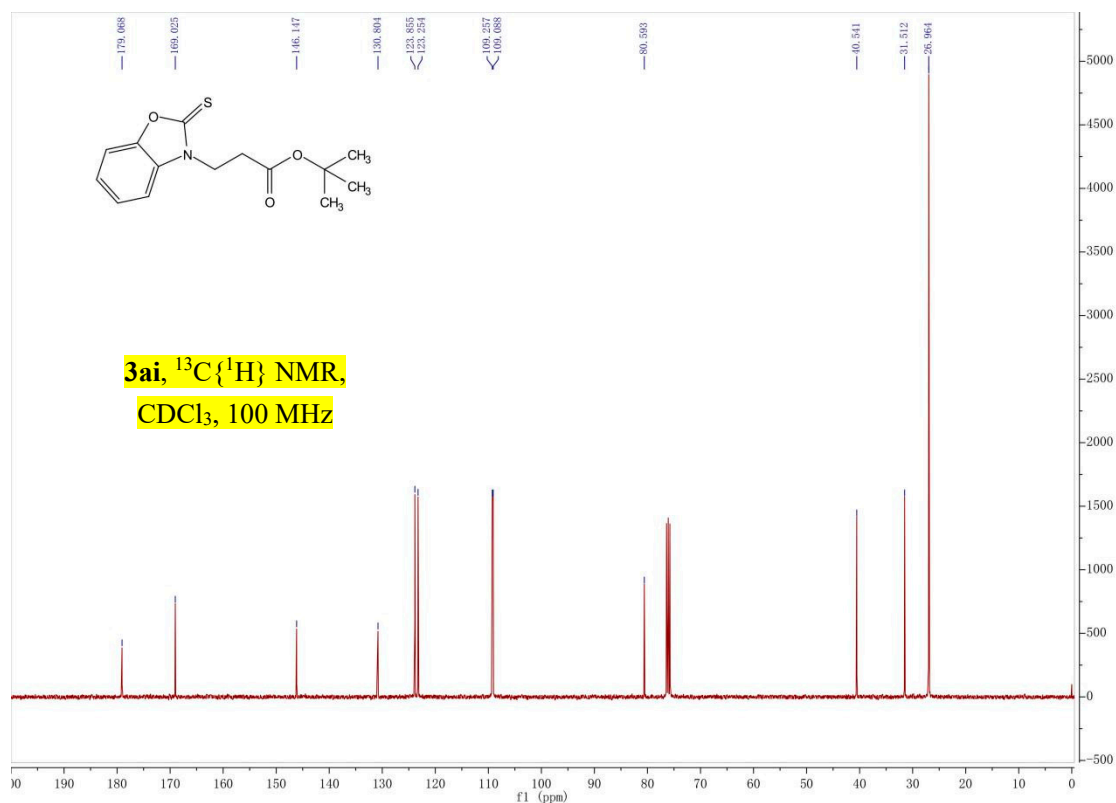

$^{13}\text{C}\{^1\text{H}\}$  NMR

***tert*-butyl 3-(4-methyl-2-thioxobenzo[d]oxazol-3(2*H*)-yl)propanoate (3aj)**

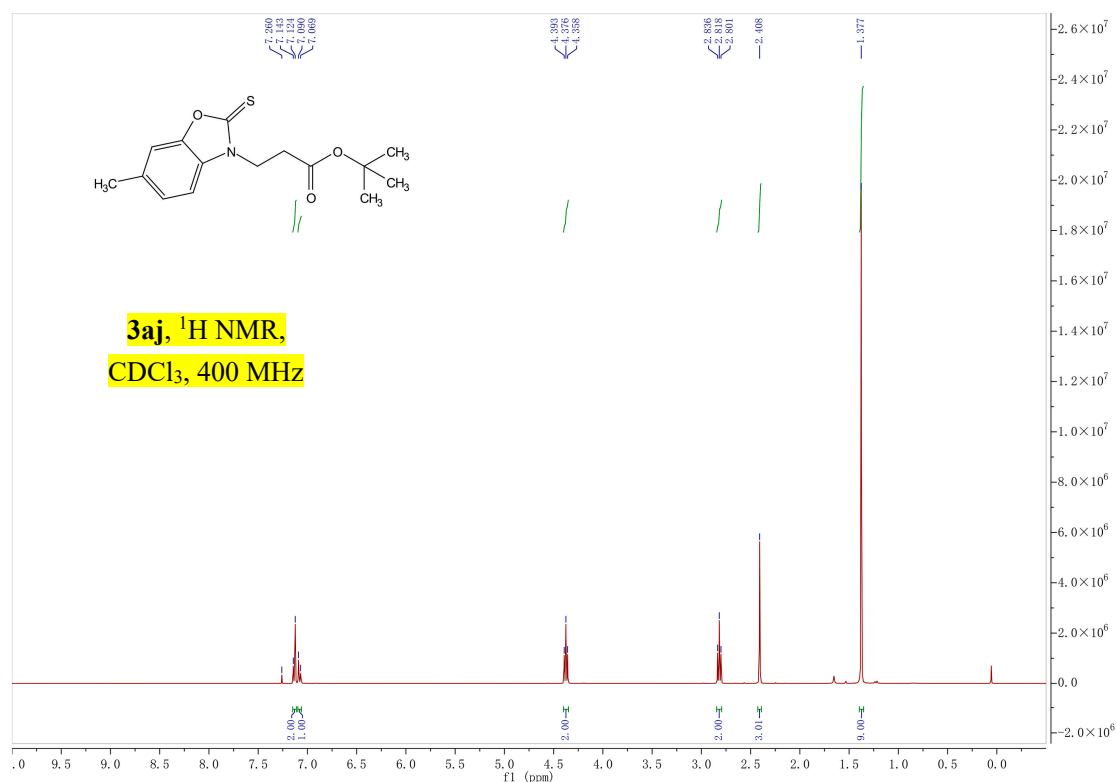

$^1\text{H}$  NMR

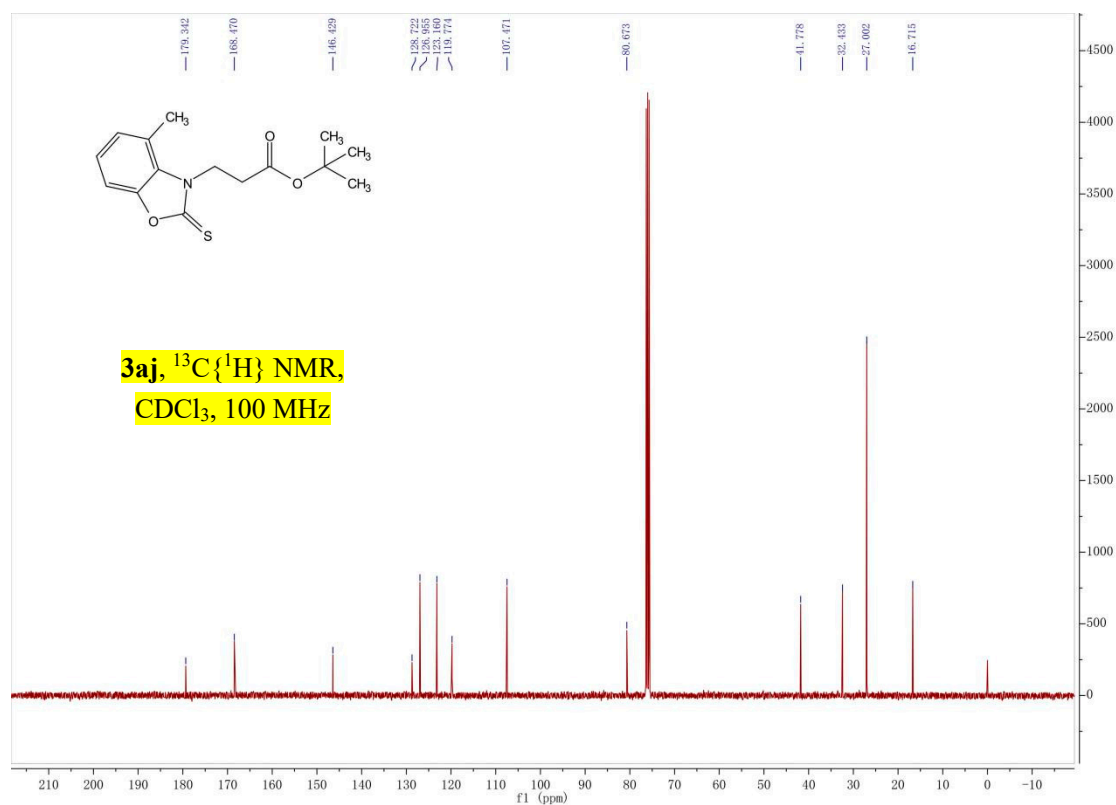

$^{13}\text{C}\{^1\text{H}\}$  NMR



***tert*-butyl 3-(6-methyl-2-thioxobenzo[d]oxazol-3(2*H*)-yl)propanoate (3ak)**

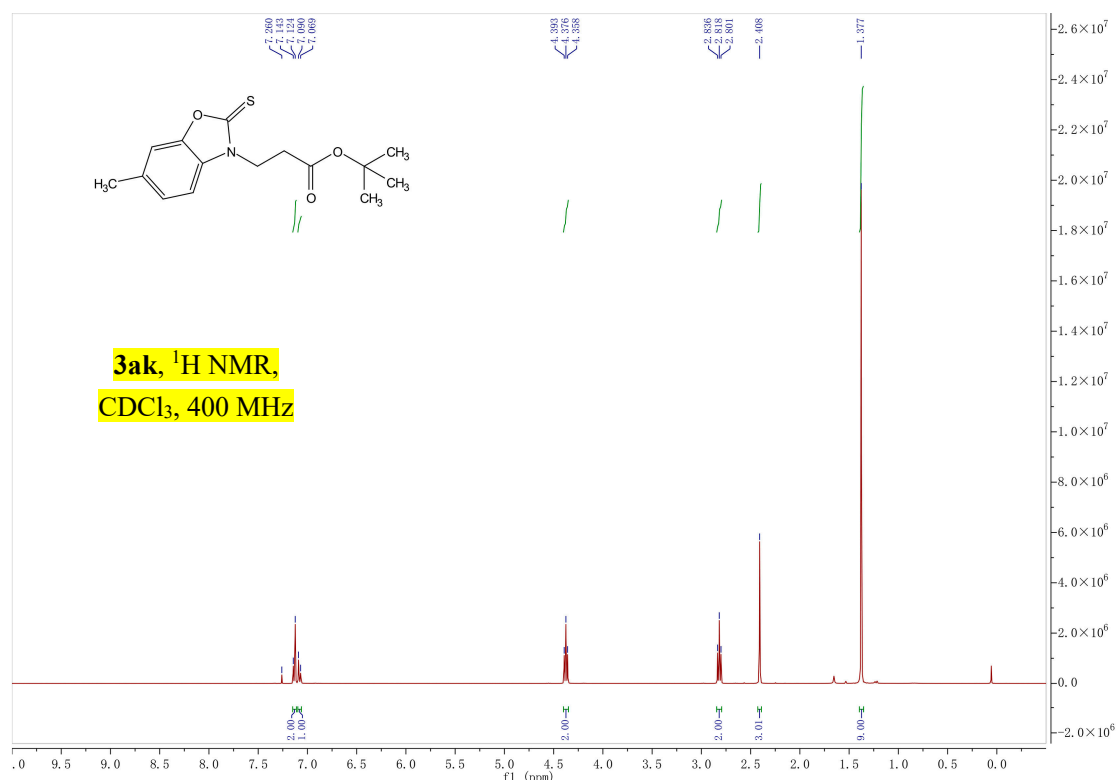

$^1\text{H}$  NMR

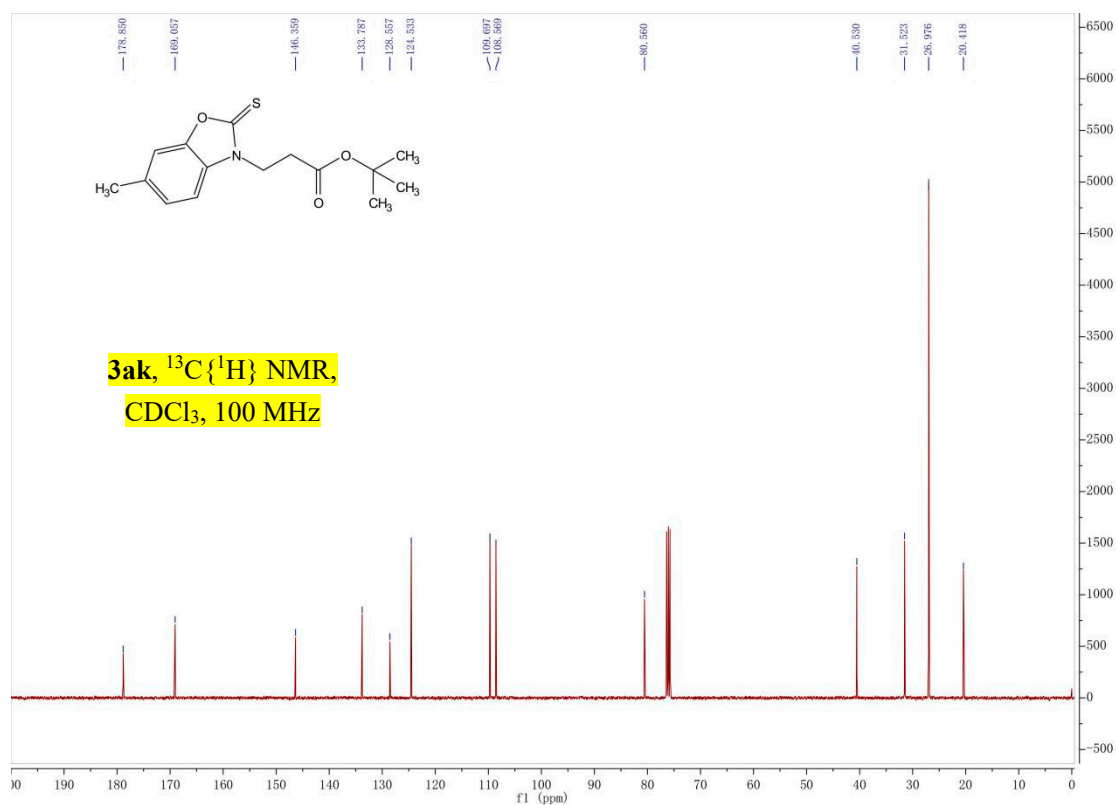

$^{13}\text{C}\{^1\text{H}\}$  NMR

***tert*-butyl 3-(5-(*tert*-butyl)-2-thioxobenzo[d]oxazol-3(2*H*)-yl)propanoate (3a)**

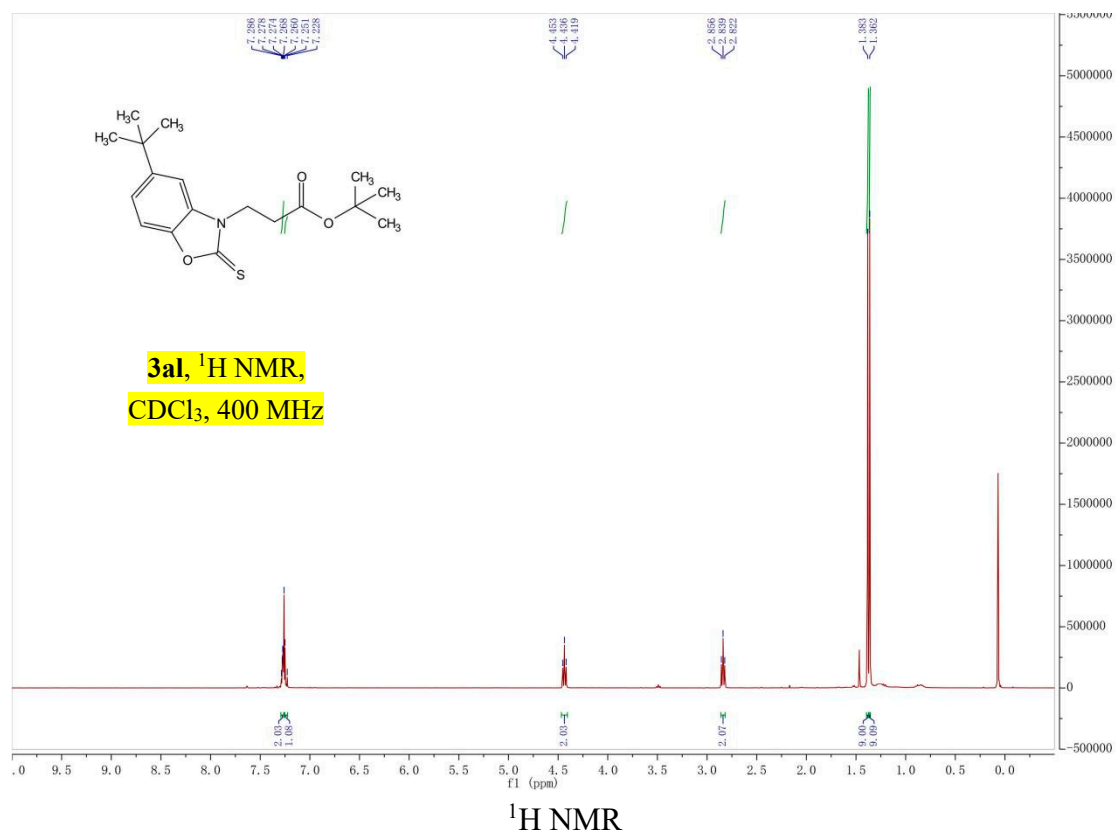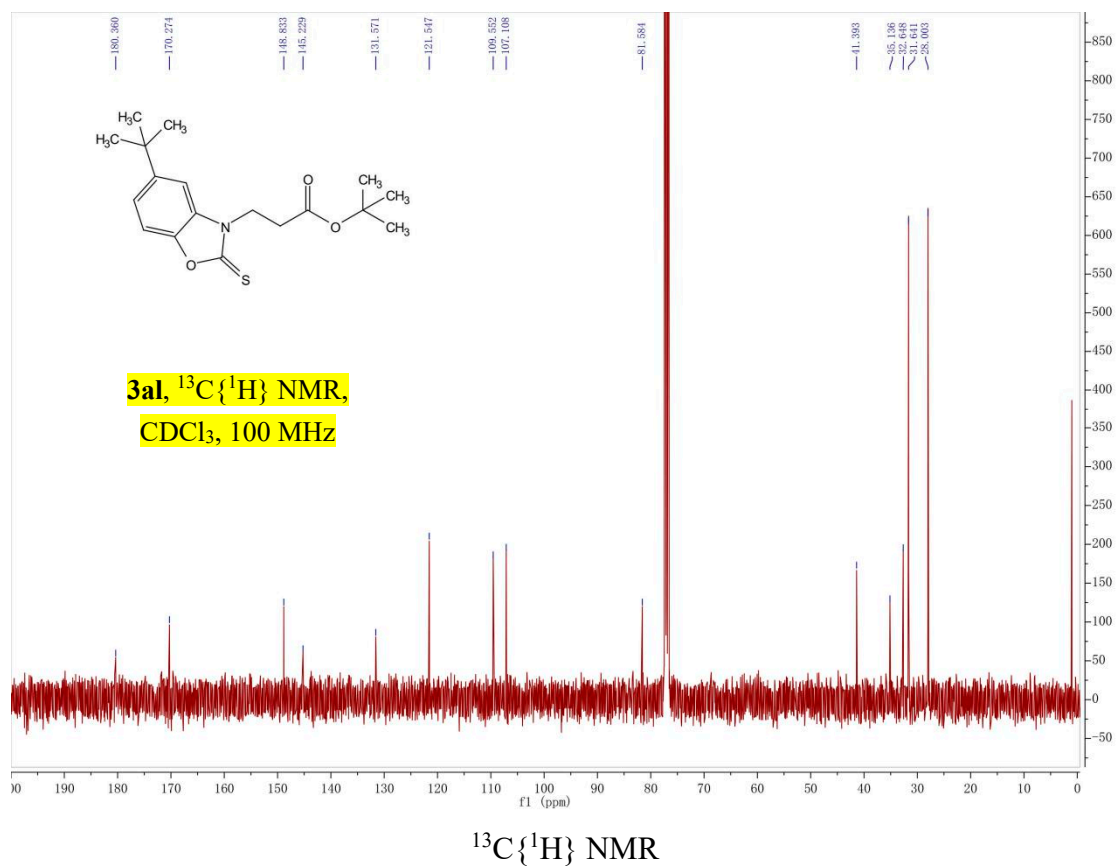

***tert*-butyl 3-(5-bromo-2-thioxobenzo[d]oxazol-3(2*H*)-yl)propanoate (3am)**

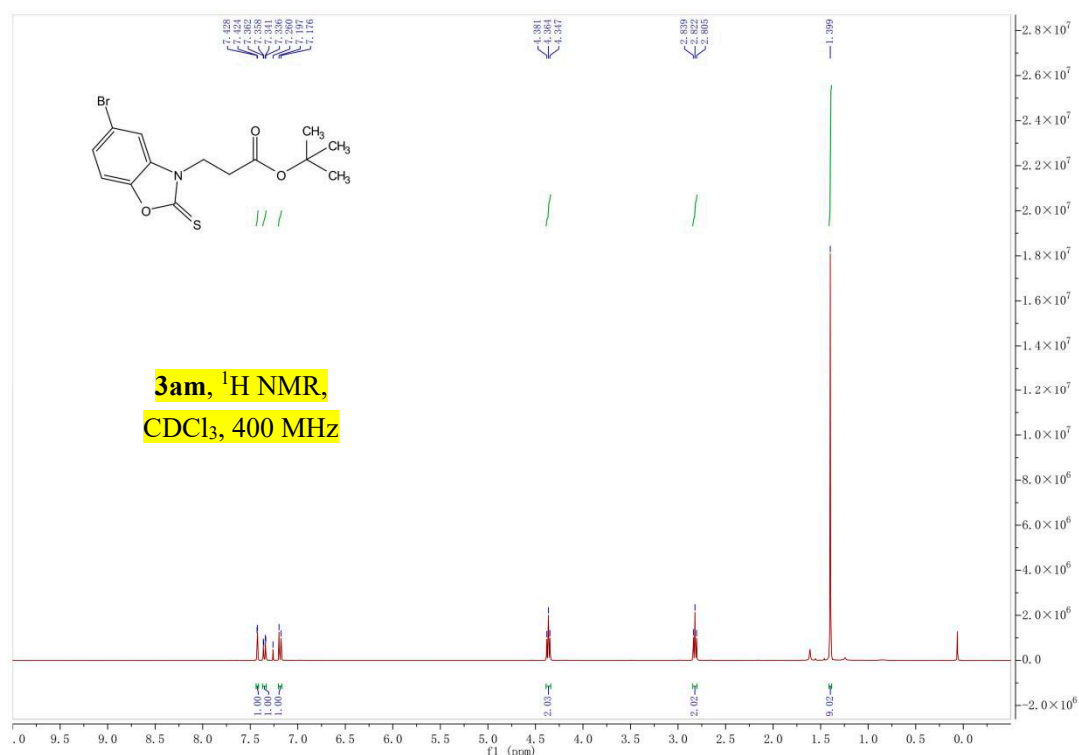

$^1\text{H}$  NMR

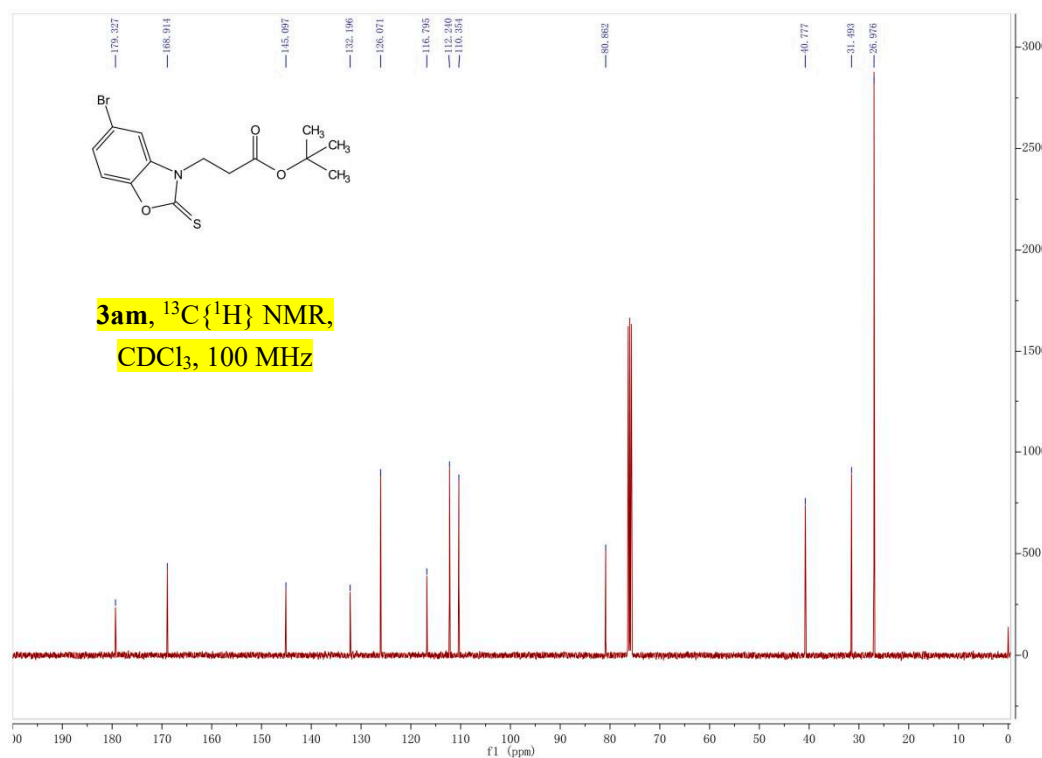

$^{13}\text{C}\{^1\text{H}\}$  NMR

***tert*-butyl 3-(6-chloro-2-thioxobenzo[d]oxazol-3(2*H*)-yl)propanoate (3an)**

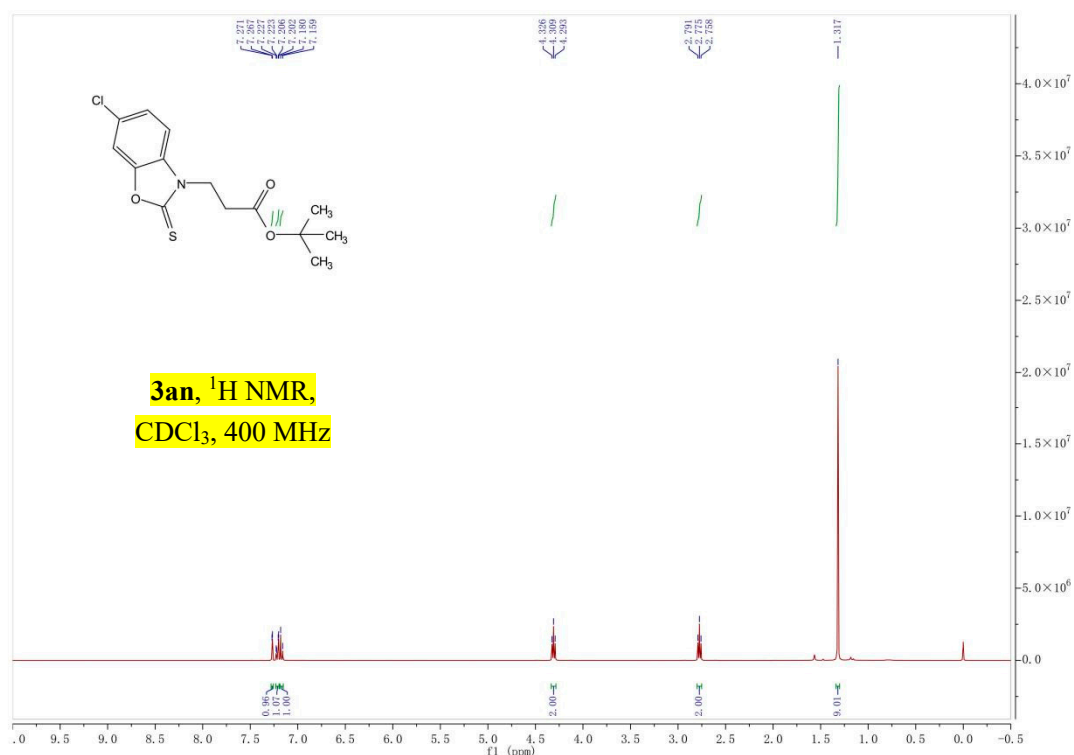

$^1\text{H}$  NMR

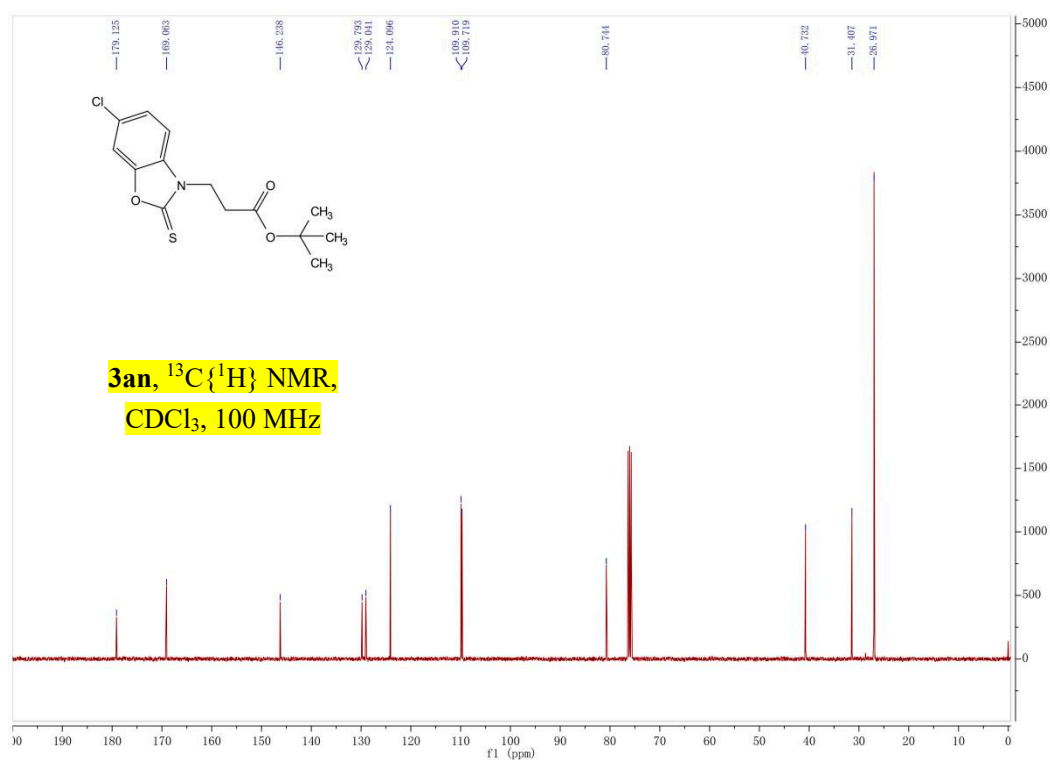

$^{13}\text{C}\{^1\text{H}\}$  NMR

cyclohexyl 3-(2-thioxobenzo[d]oxazol-3(2*H*)-yl)propanoate (3ao)

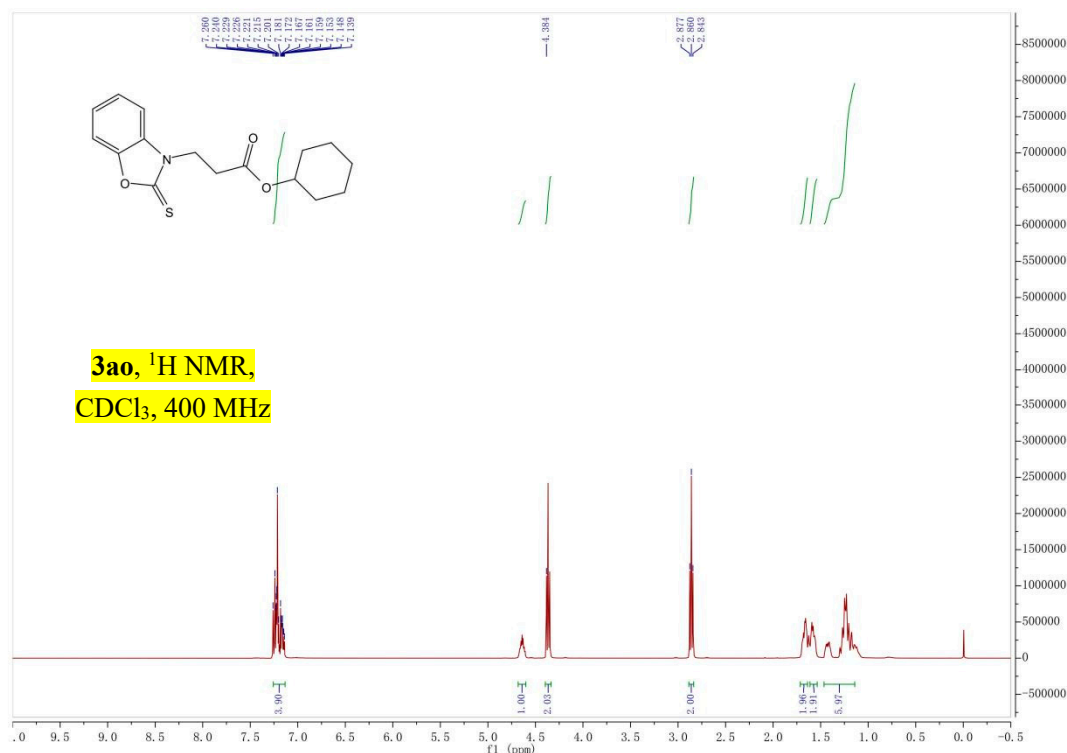

$^1\text{H}$  NMR

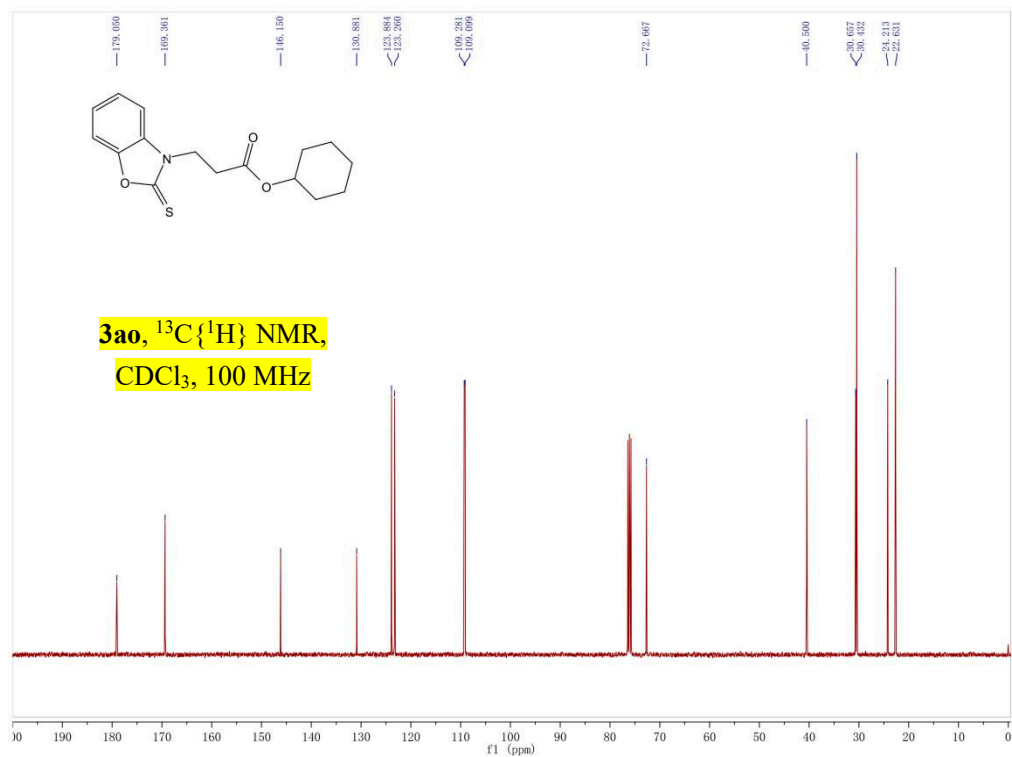

$^{13}\text{C}\{^1\text{H}\}$  NMR

cyclohexyl 3-((6-methylbenzo[d]oxazol-2-yl)thio)propanoate (3ap)

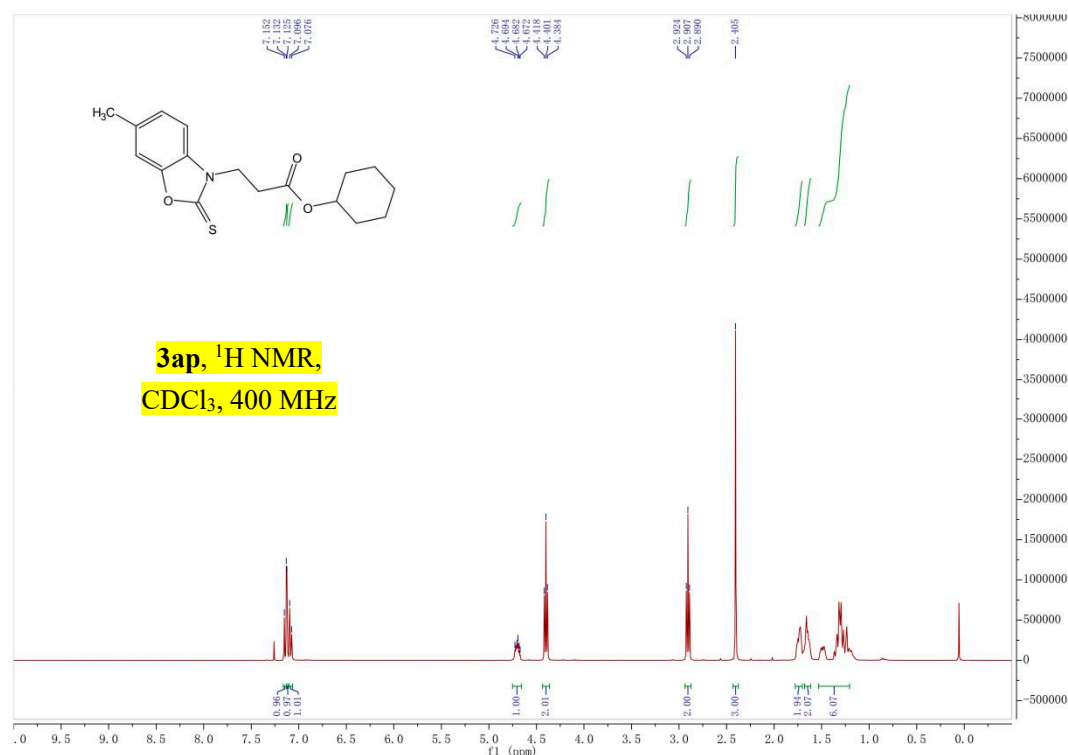

$^1\text{H}$  NMR

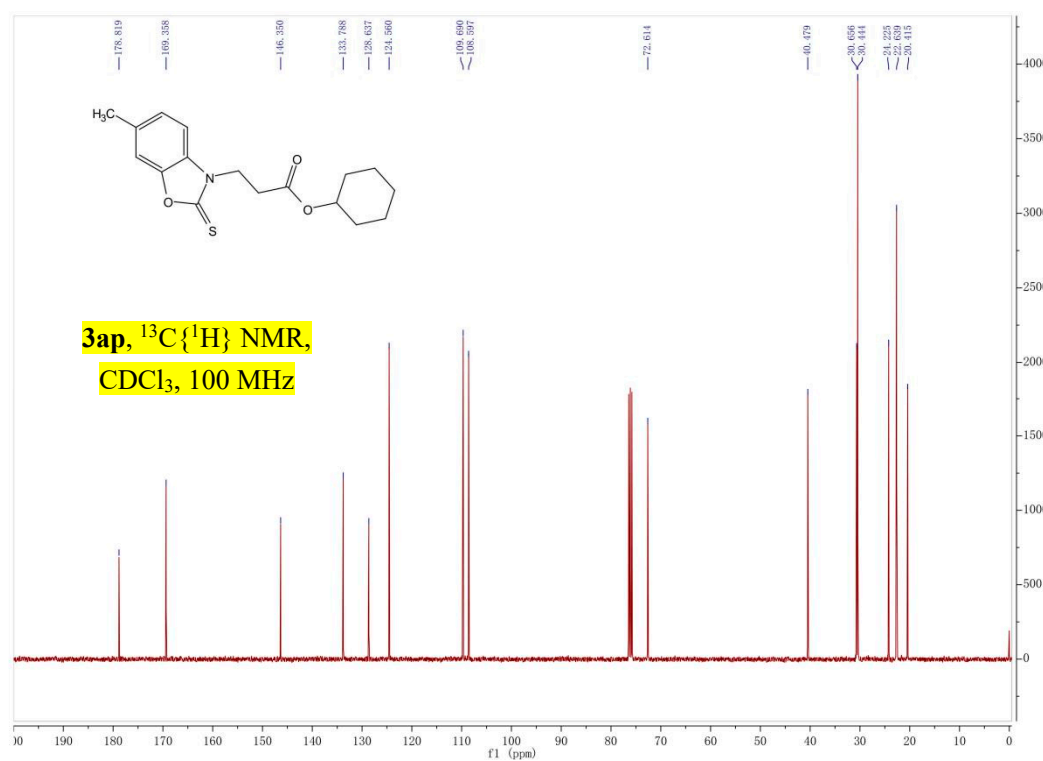

$^{13}\text{C}\{^1\text{H}\}$  NMR

cyclohexyl 3-(5-(*tert*-butyl)-2-thioxobenzo[d]oxazol-3(2*H*)-yl)propanoate (**3aq**)

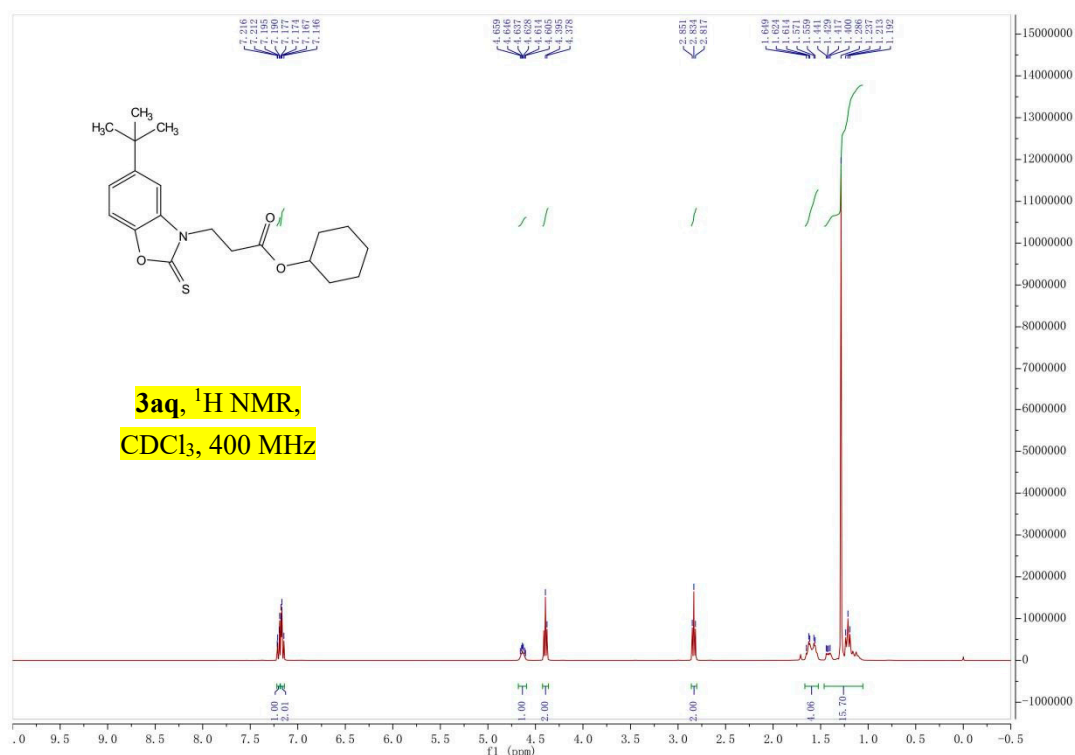

$^1\text{H}$  NMR

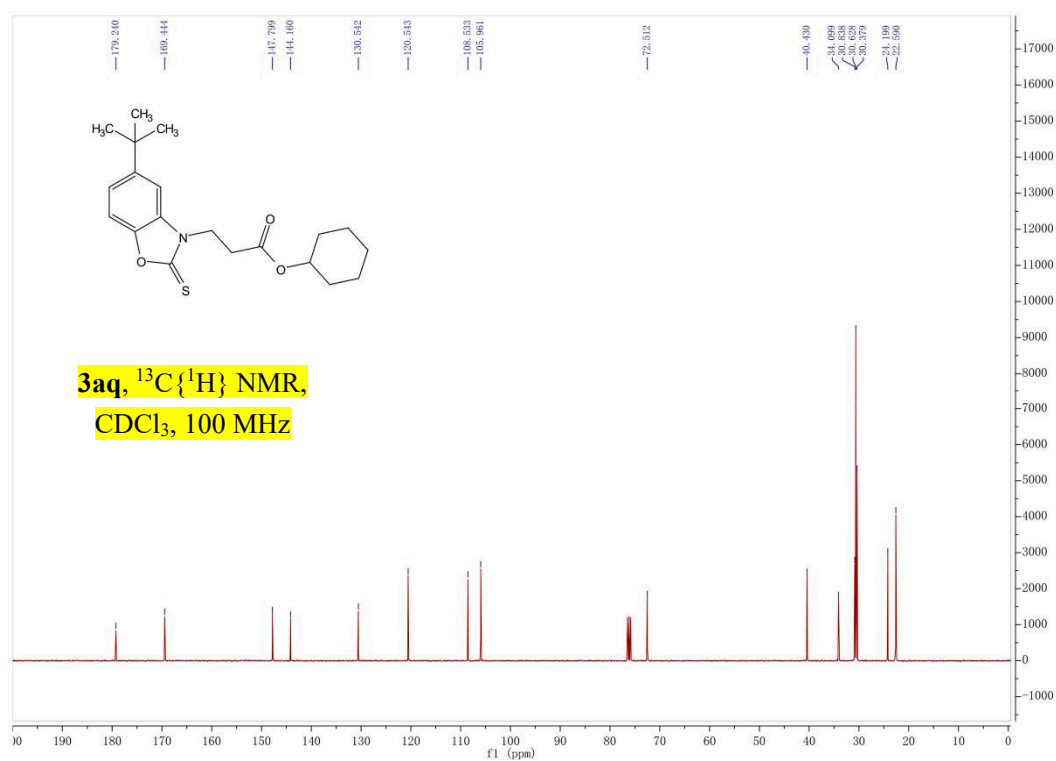

$^{13}\text{C}\{^1\text{H}\}$  NMR

**cyclohexyl 3-(4-methyl-2-thioxobenzo[*d*]oxazol-3(2*H*)-yl)propanoate (3ar)**

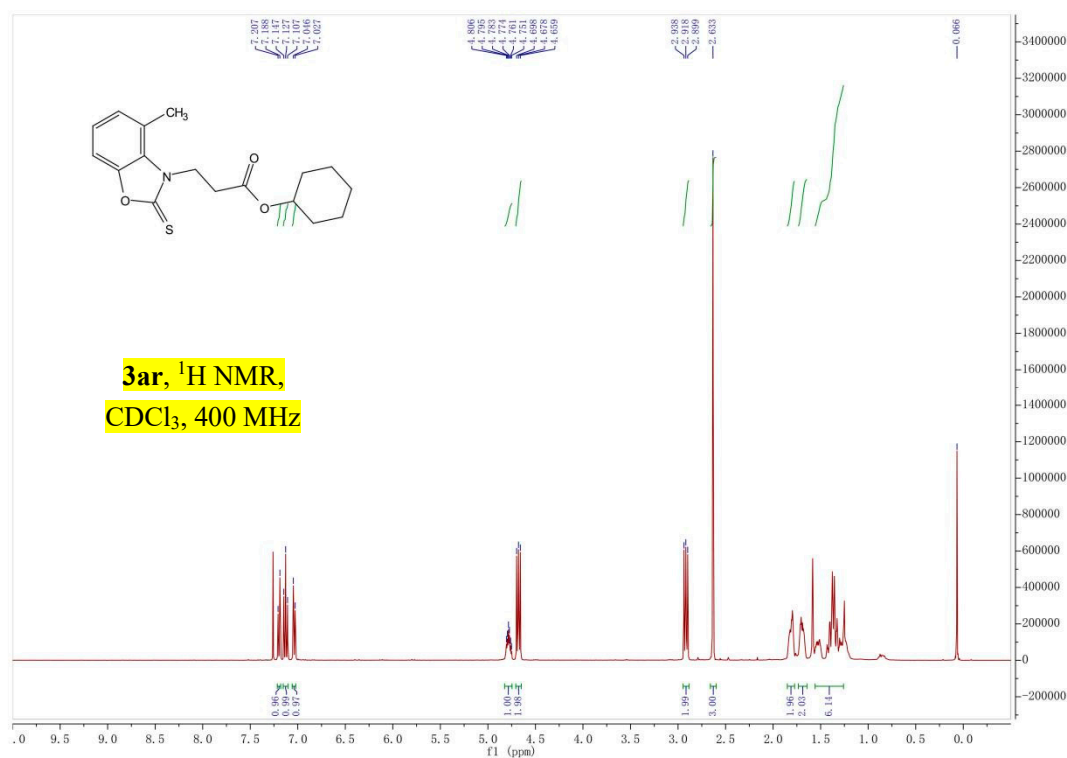<sup>1</sup>H NMR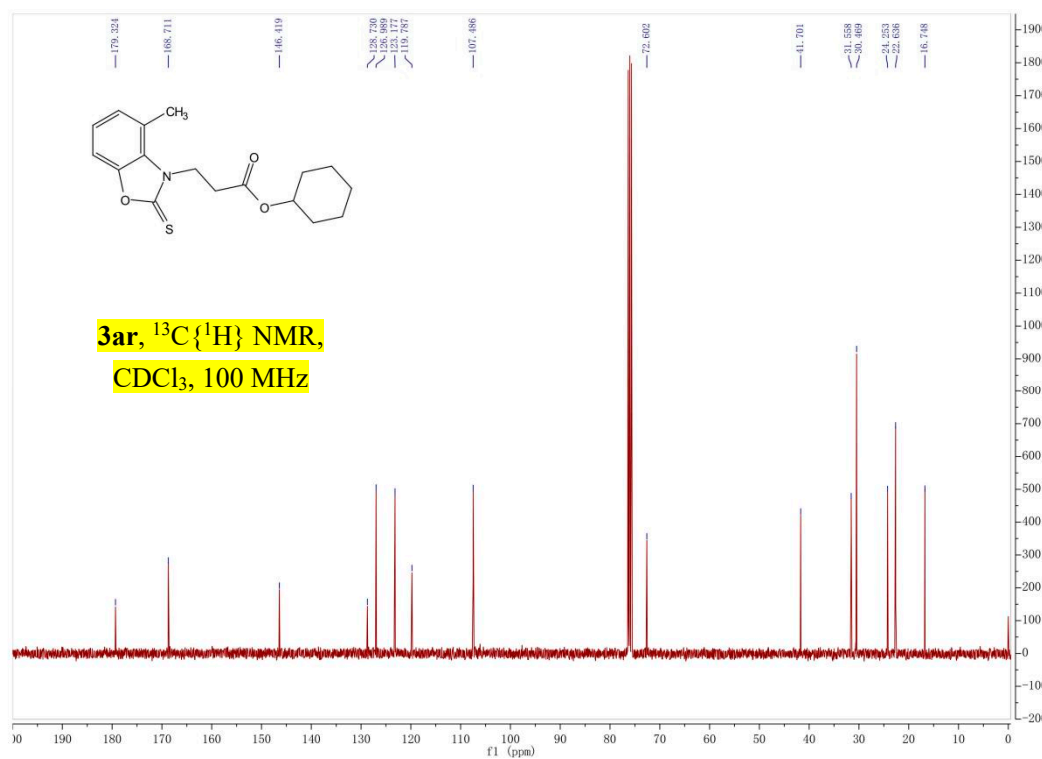 $^{13}\text{C}\{^1\text{H}\}$  NMR



**cyclohexyl 3-(5-bromo-2-thioxobenzo[*d*]oxazol-3(2*H*)-yl)propanoate (3as)**

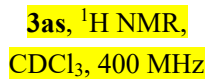<sup>1</sup>H NMR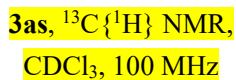 $^{13}\text{C}\{^1\text{H}\}$  NMR

cyclohexyl 3-(6-chloro-2-thioxobenzo[d]oxazol-3(2H)-yl)propanoate (3at)

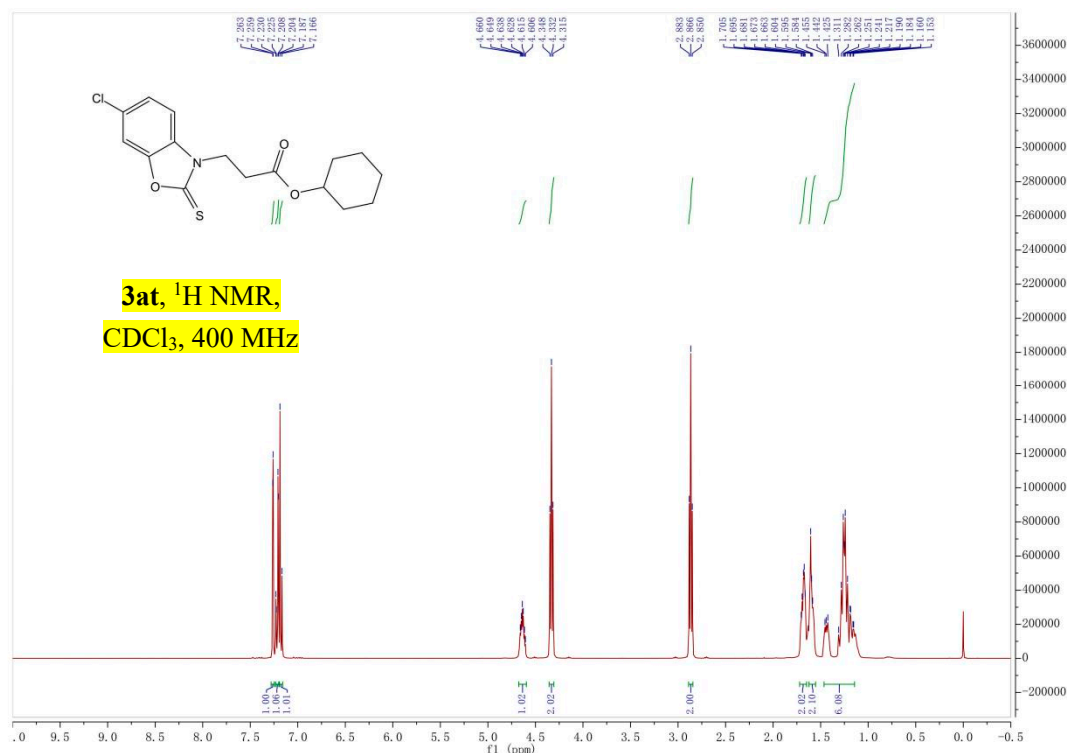

$^1\text{H}$  NMR

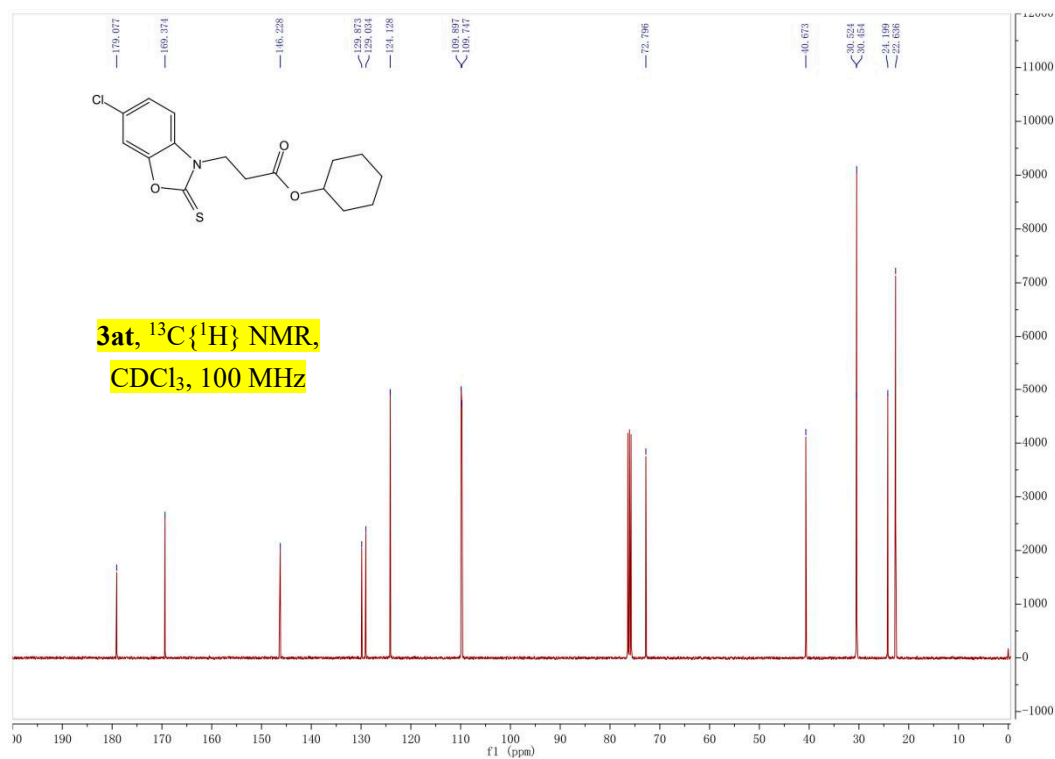

$^{13}\text{C}\{^1\text{H}\}$  NMR

**cyclohexyl 3-(5-chloro-2-thioxobenzo[d]oxazol-3(2*H*)-yl)propanoate (3au)**

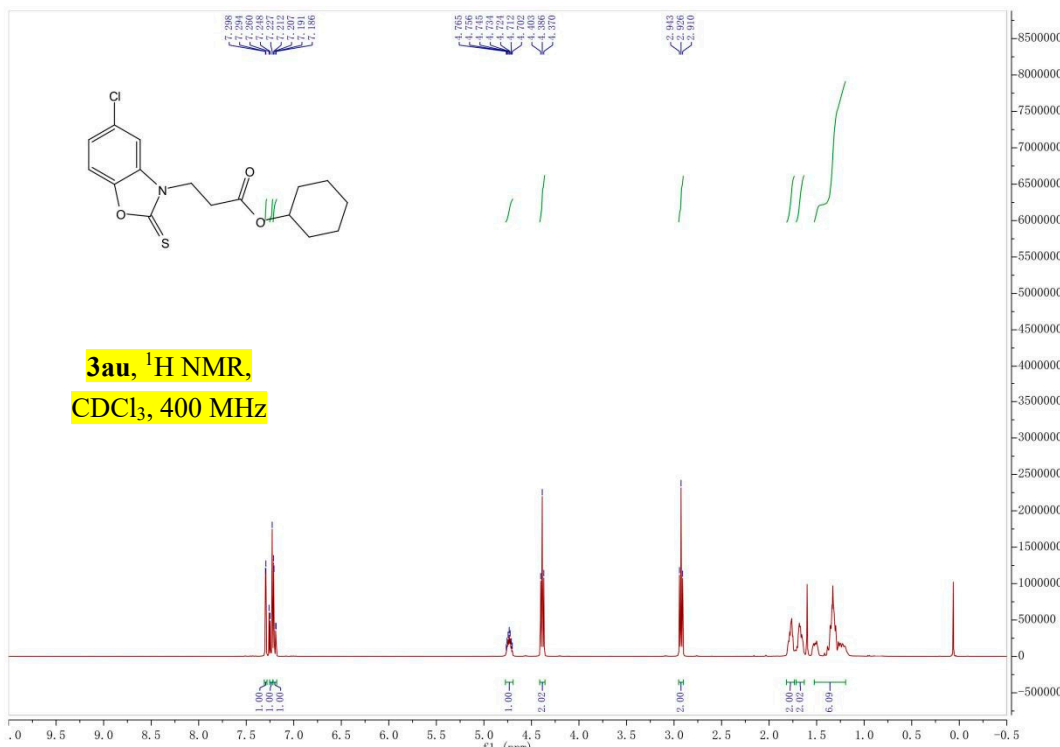<sup>1</sup>H NMR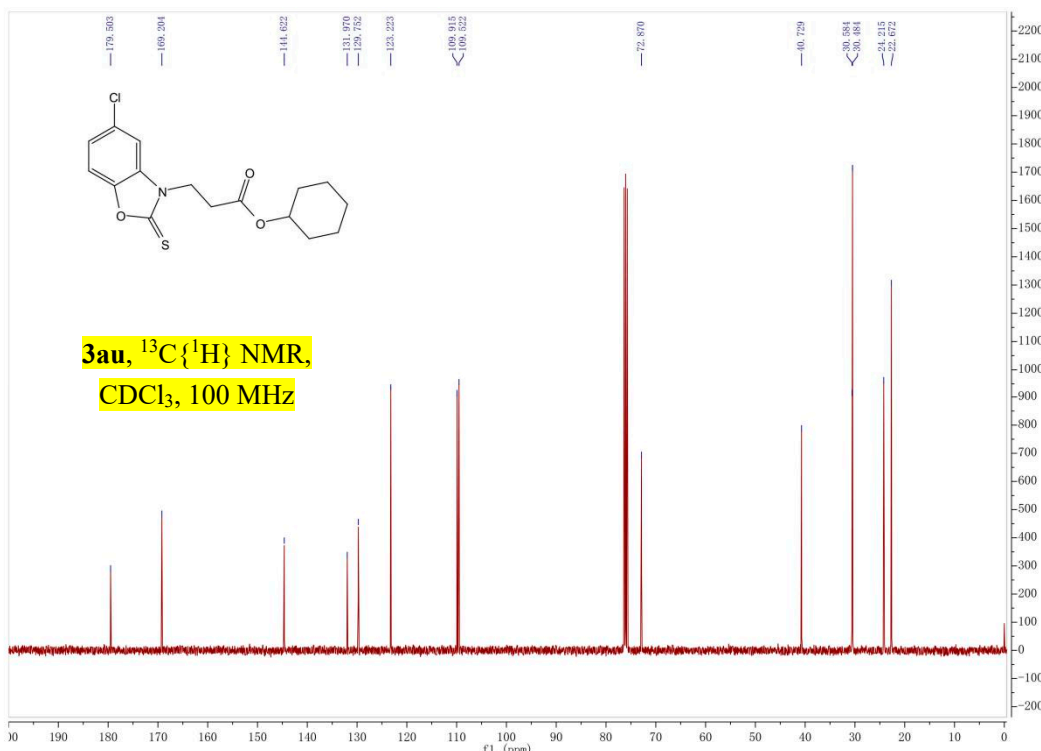 $^{13}\text{C}\{^1\text{H}\}$  NMR

**cyclohexyl 3-(5-methyl-2-thioxobenzo[d]oxazol-3(2*H*)-yl)propanoate (3av)**

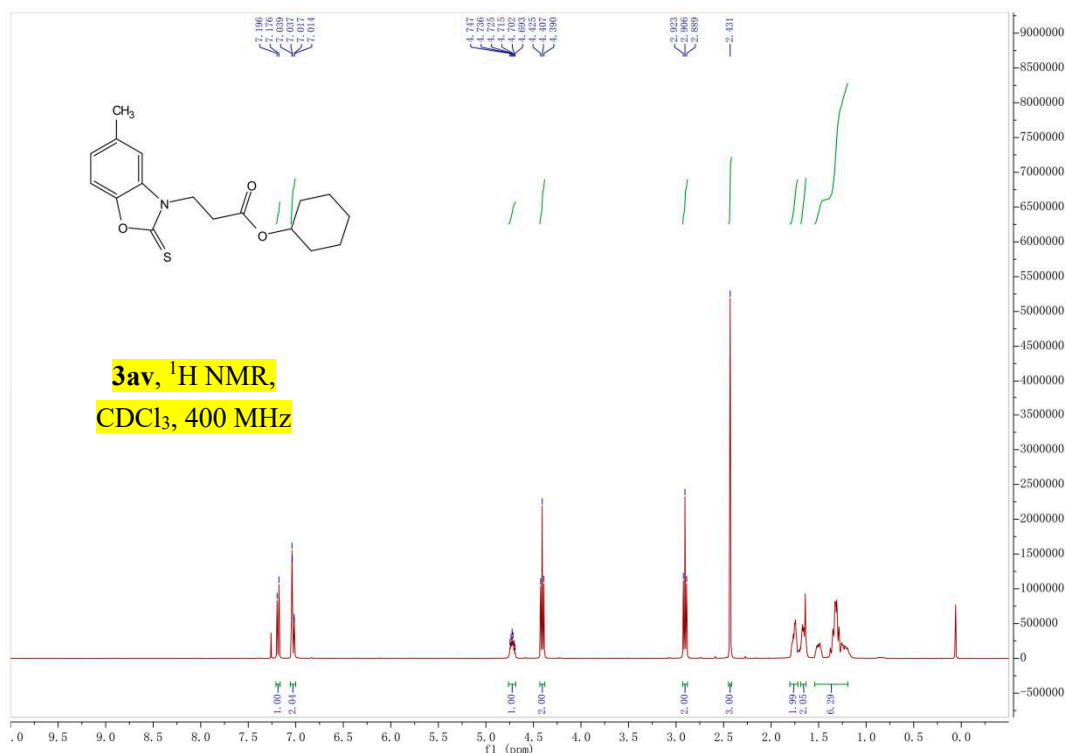<sup>1</sup>H NMR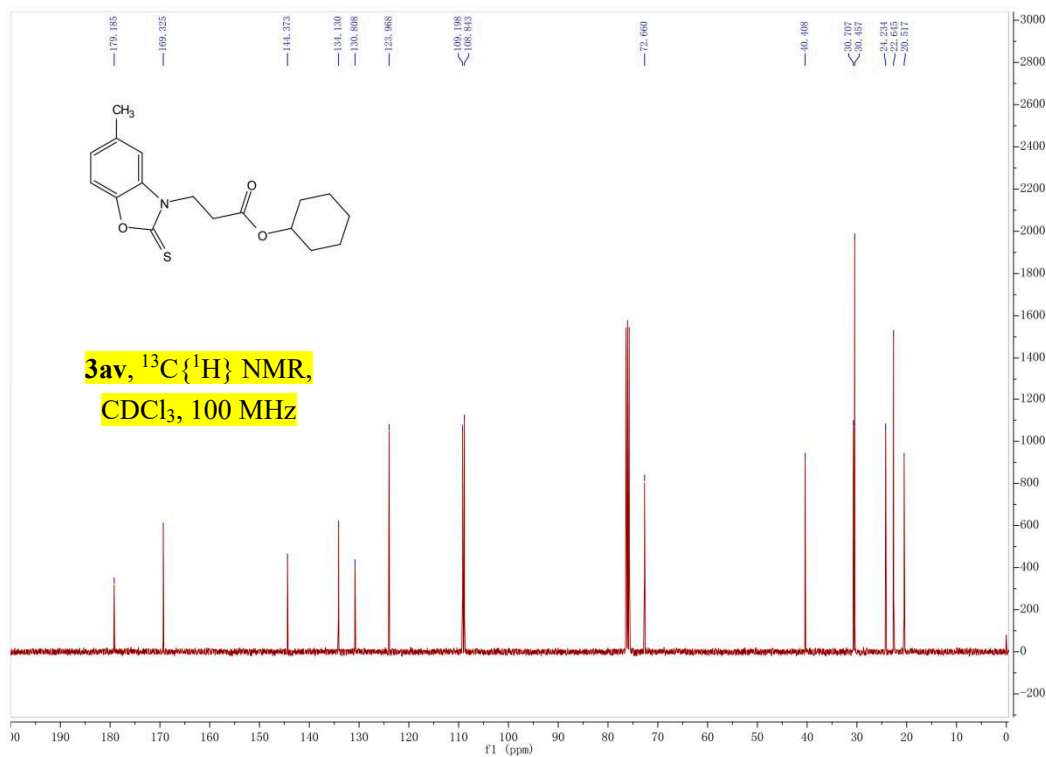 $^{13}\text{C}\{^1\text{H}\}$  NMR

ethyl 3-(benzo[d]thiazol-2-ylthio)propanoate (5aa)

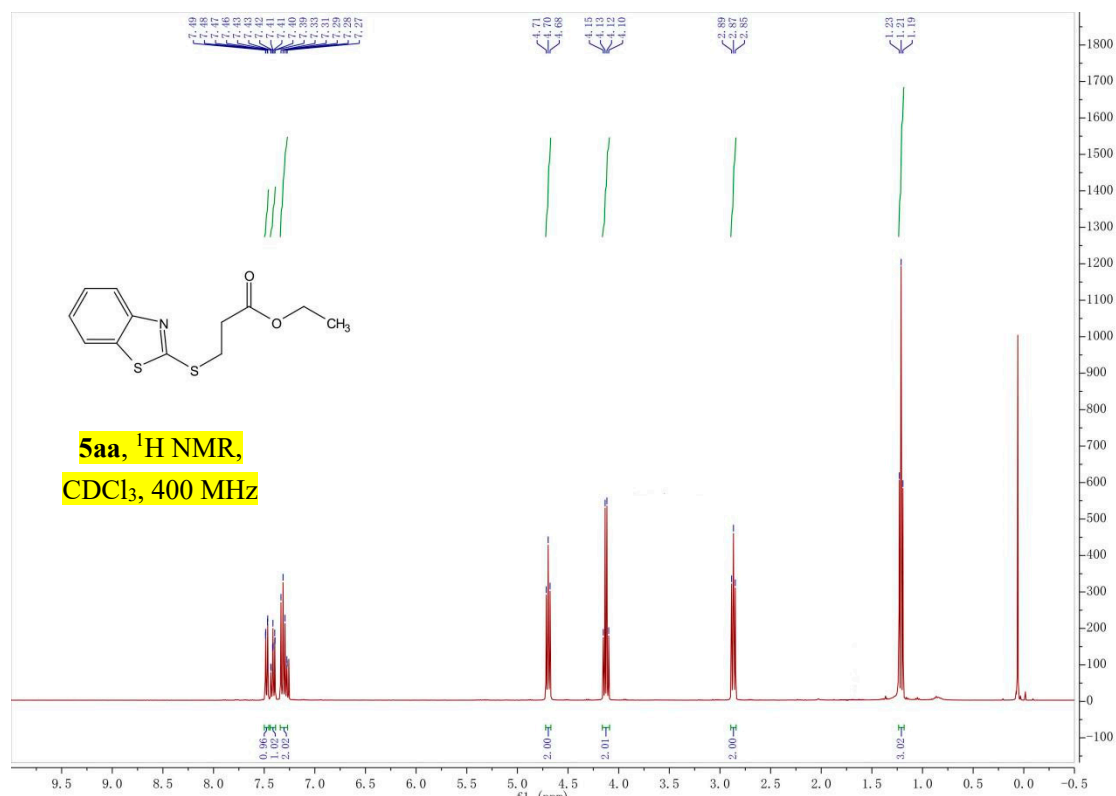

$^1\text{H}$  NMR

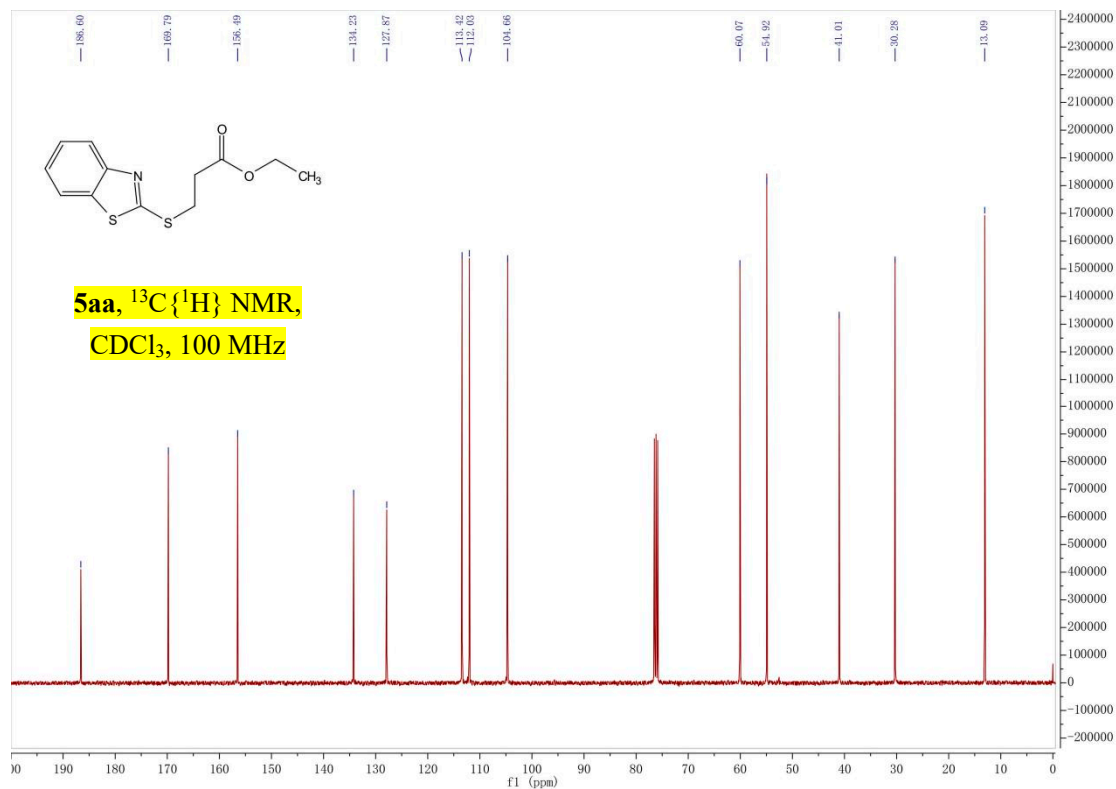

$^{13}\text{C}\{^1\text{H}\}$  NMR

***tert*-butyl 3-(benzo[*d*]thiazol-2-ylthio)propanoate (5ab)**

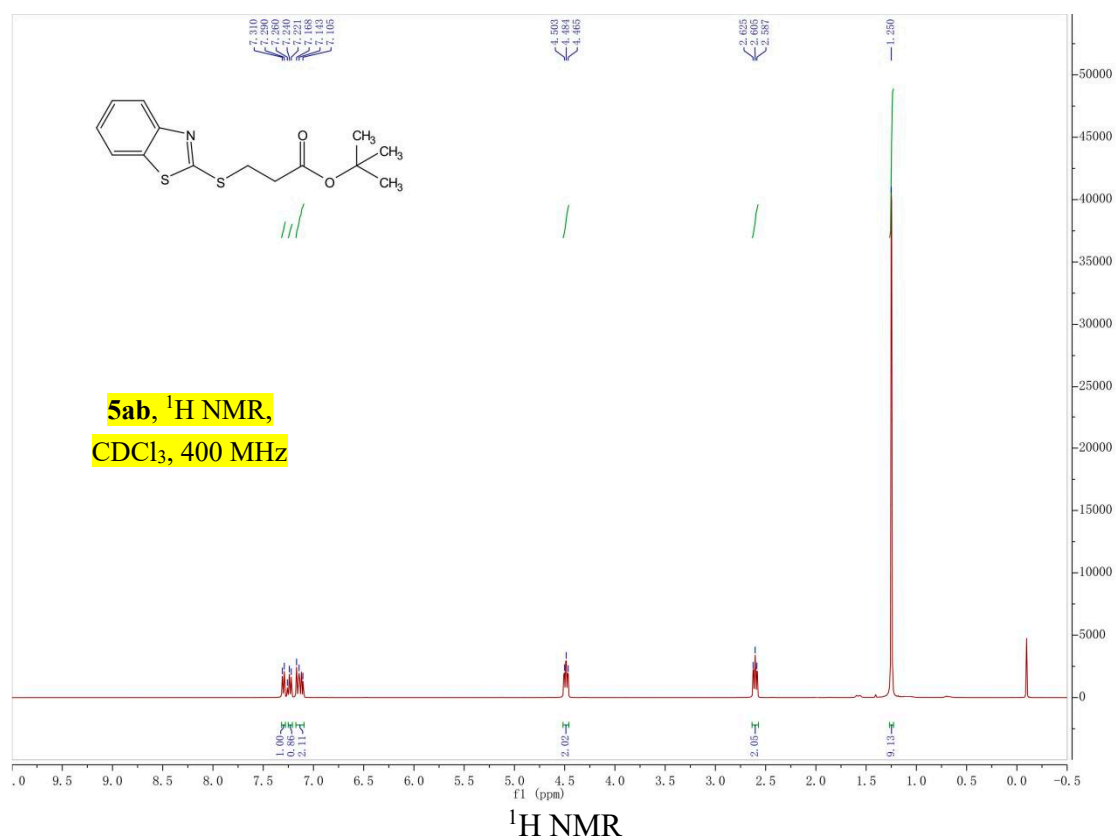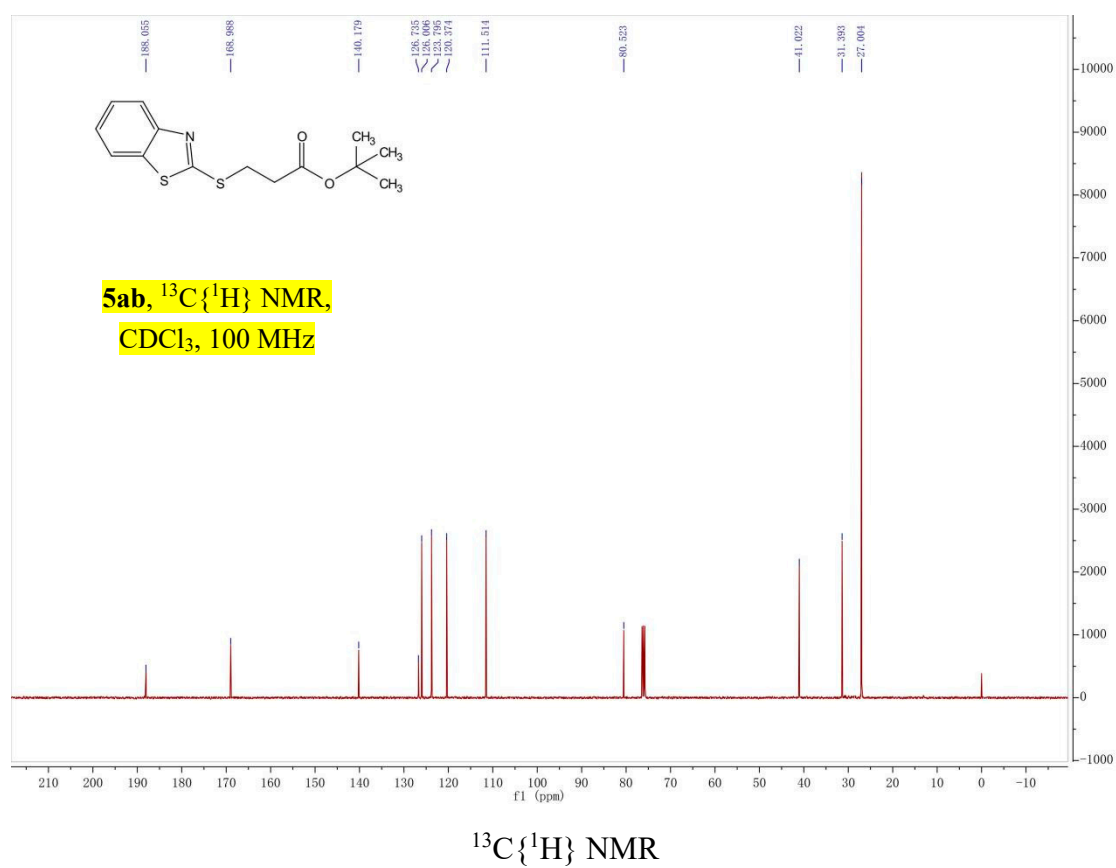

**cyclohexyl 3-(benzo[*d*]thiazol-2-ylthio)propanoate (5ac)**

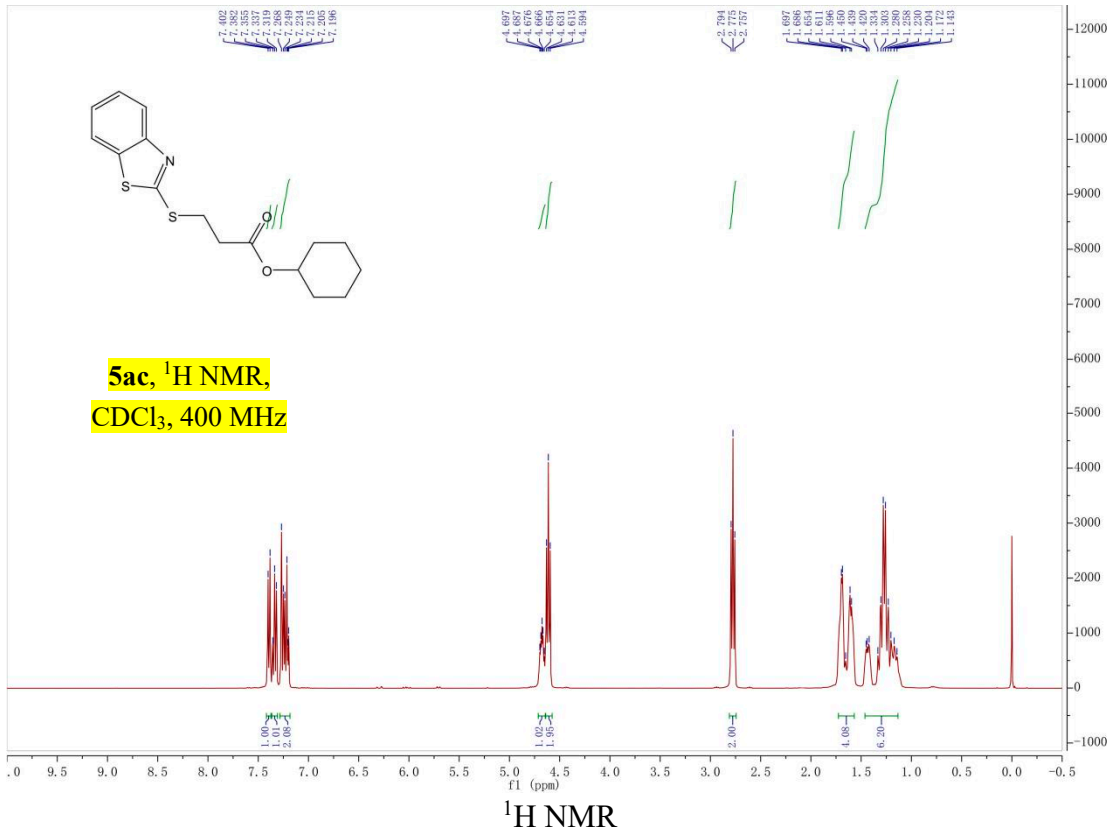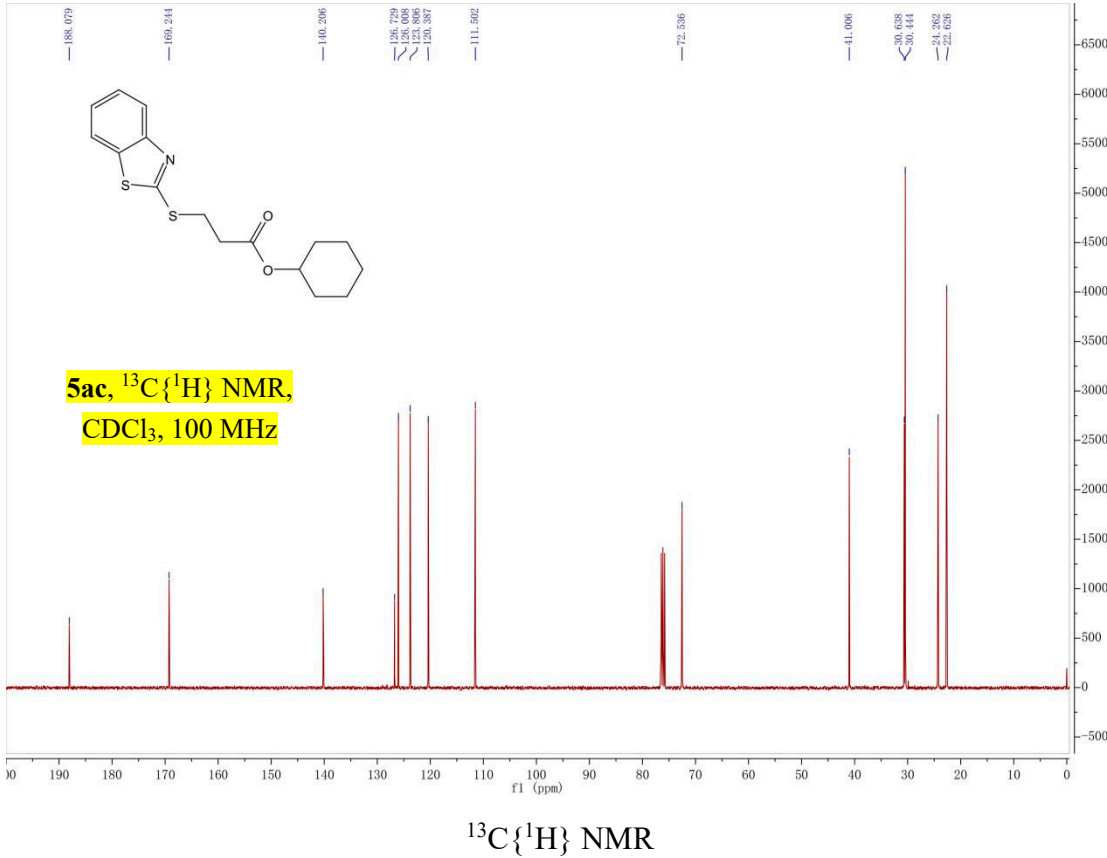

ethyl 3-((5-chlorobenzo[d]thiazol-2-yl)thio)propanoate (5ad)

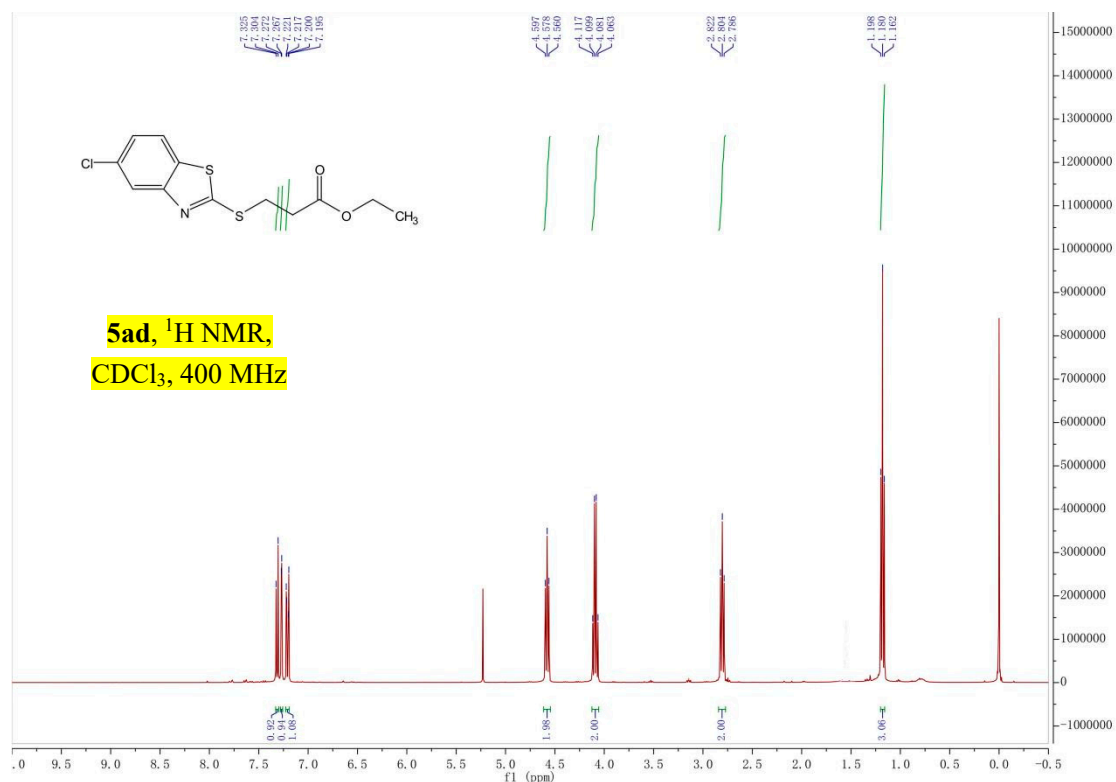

$^1\text{H}$  NMR

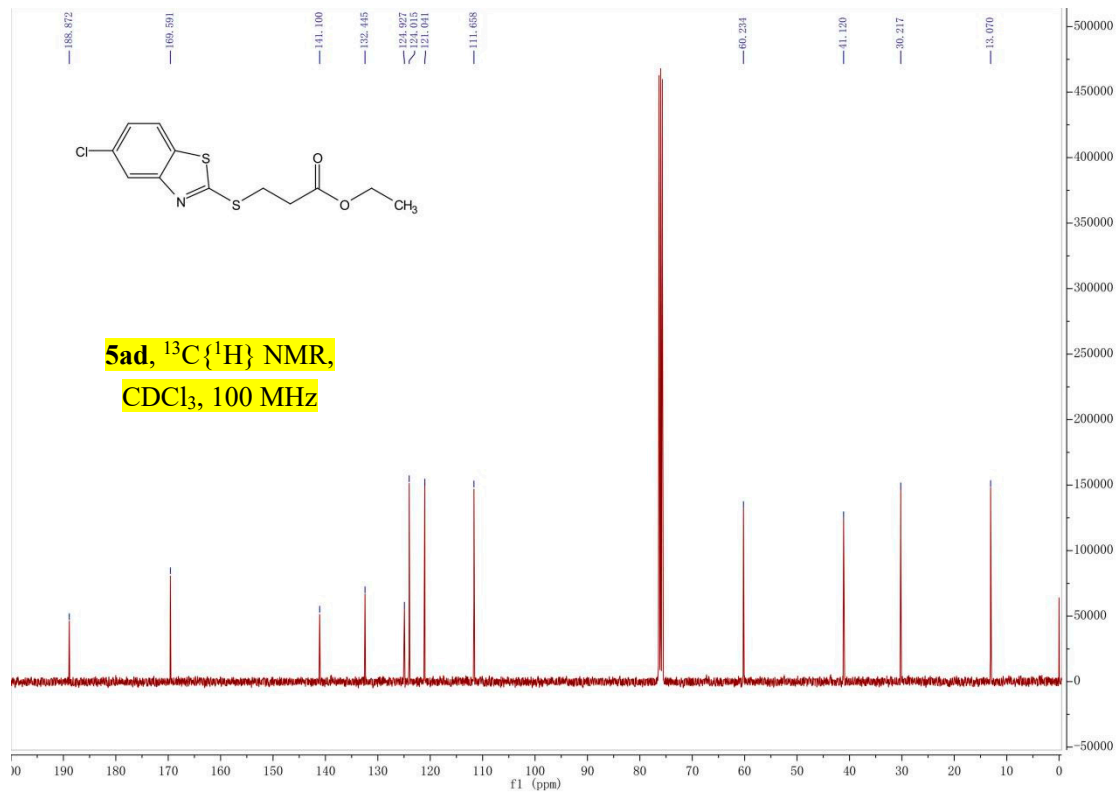

$^{13}\text{C}\{^1\text{H}\}$  NMR



***tert*-butyl 3-((5-chlorobenzo[d]thiazol-2-yl)thio)propanoate (5ae)**

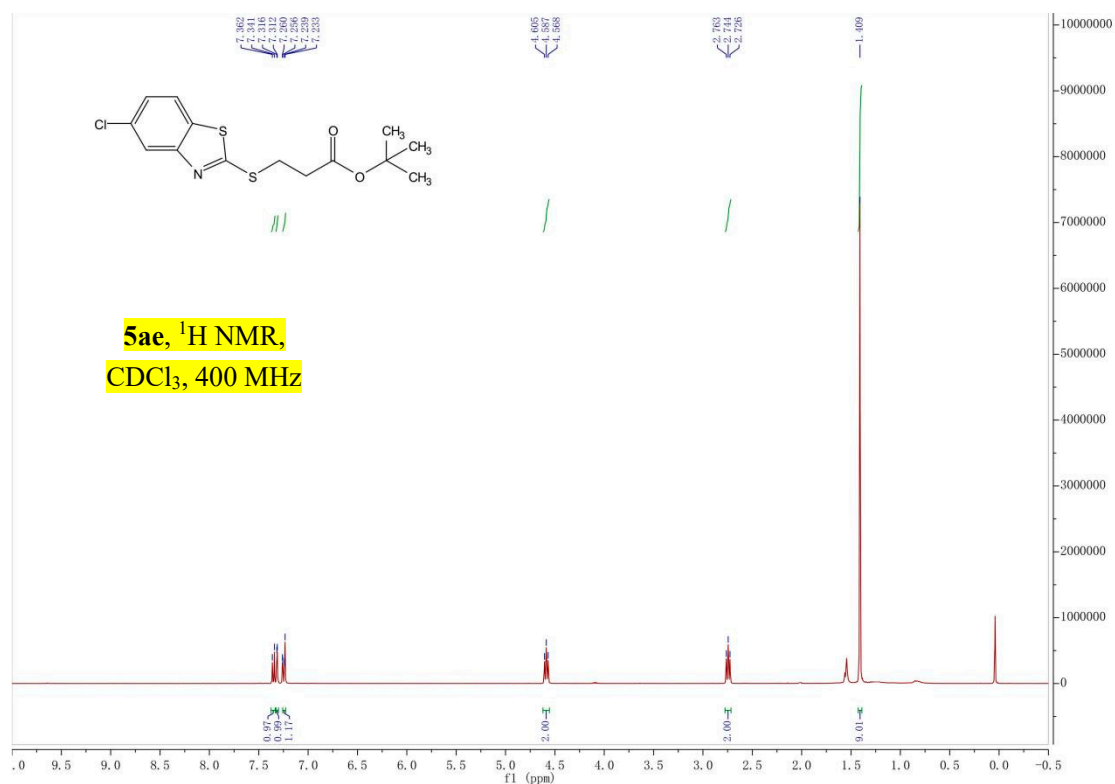

$^1\text{H}$  NMR

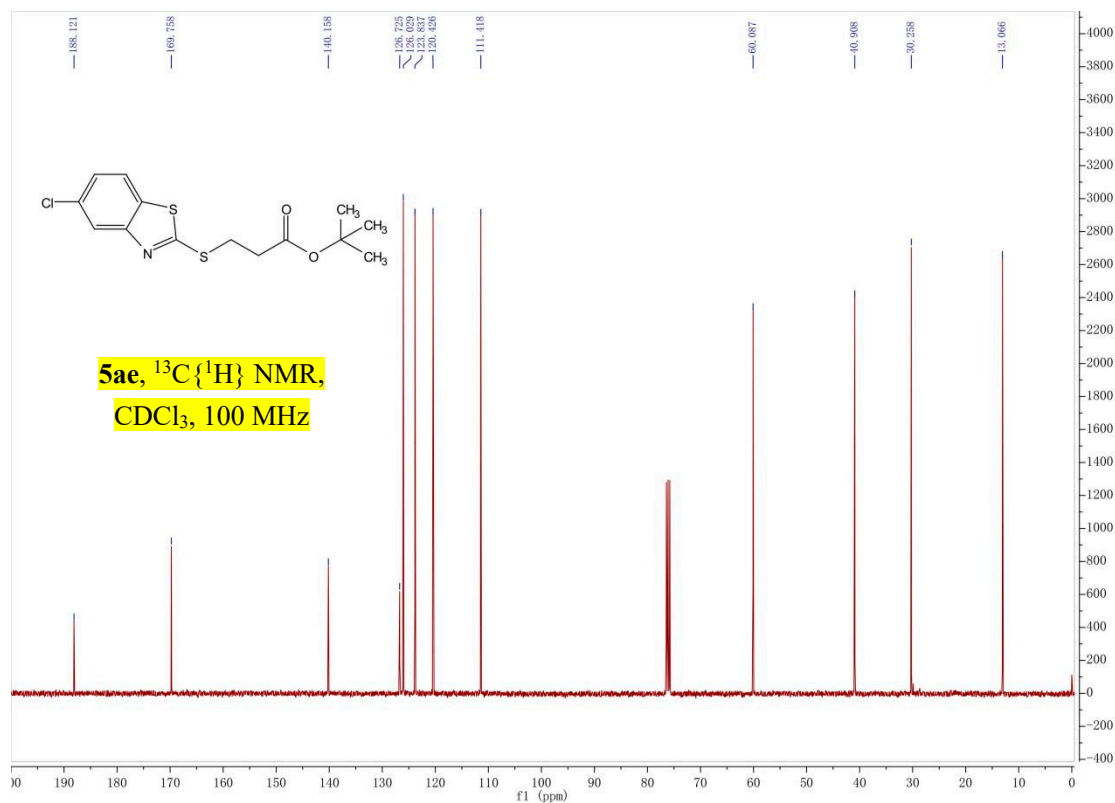

$^{13}\text{C}\{^1\text{H}\}$  NMR

cyclohexyl 3-((5-chlorobenzo[d]thiazol-2-yl)thio)propanoate (5af)

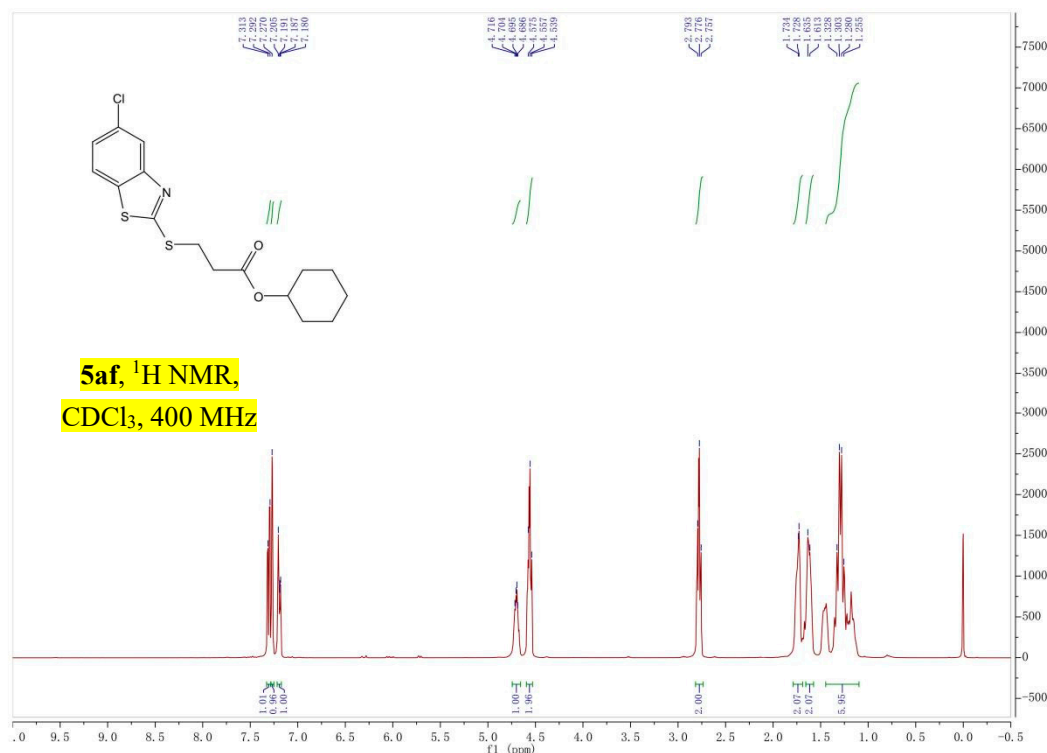

$^1\text{H}$  NMR

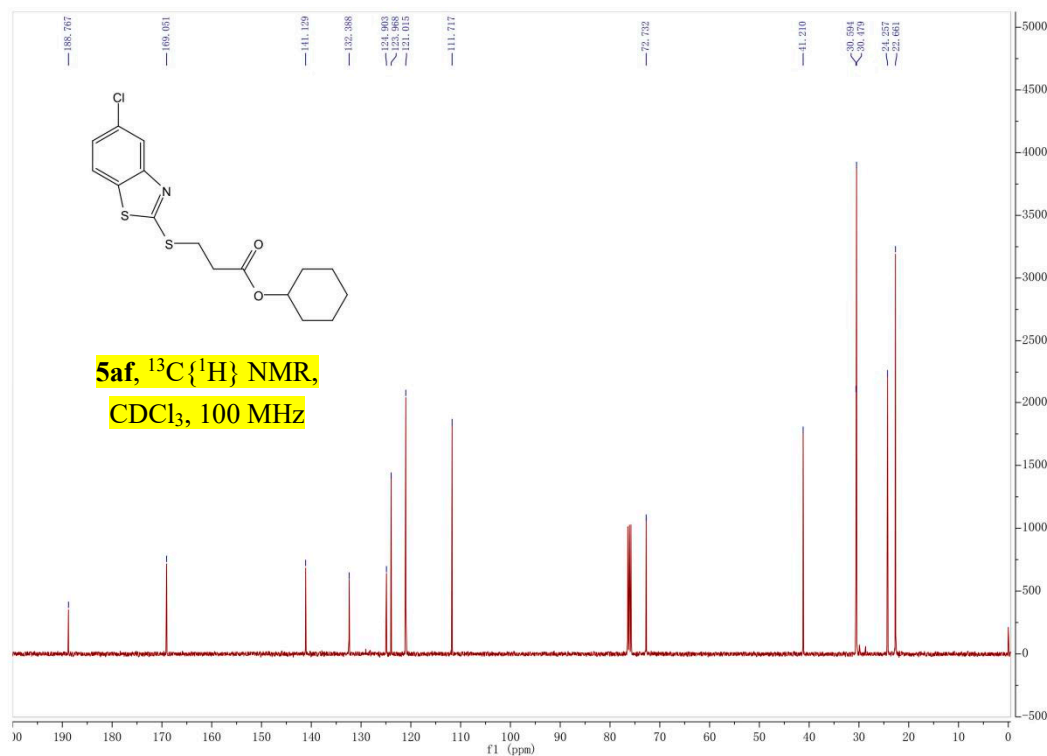

$^{13}\text{C}\{^1\text{H}\}$  NMR

***tert*-butyl 3-((6-methoxybenzo[d]thiazol-2-yl)thio)propanoate (5ag)**

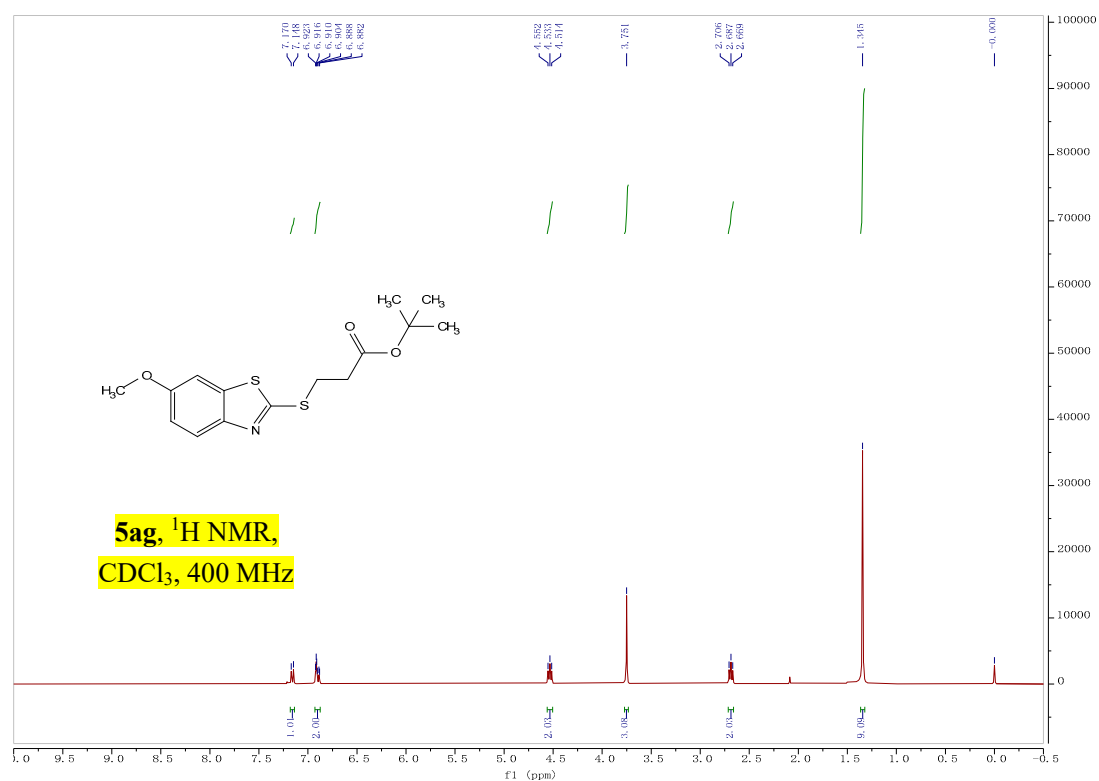

**$^1\text{H}$  NMR**

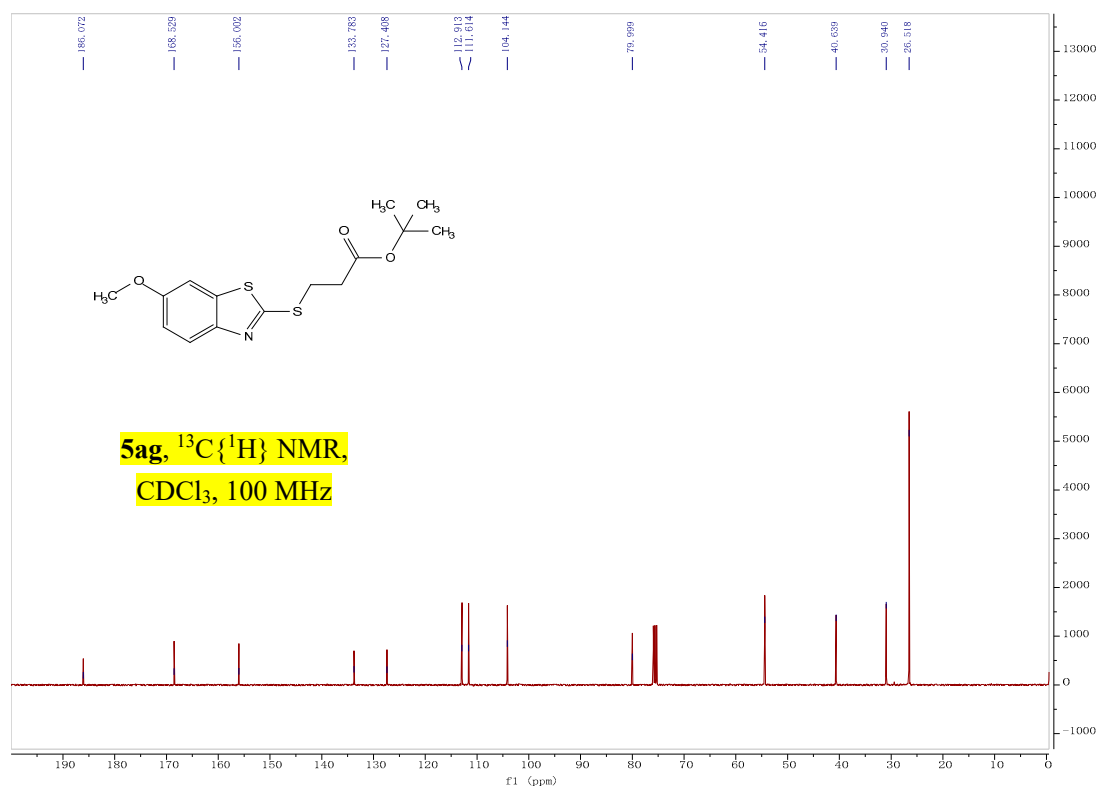

**$^{13}\text{C}\{^1\text{H}\}$  NMR**
